# Supplementary material for: Investigation of cobalt(iii)–phenylalanine complexes for hypoxia-activated drug delivery
Source: Royal Society of Chemistry journal article supplement (doi:10.1039/d0dt01389g), 2020-01-01
Supplement: d0dt01389g1.pdf [file d0dt01389g1.pdf]

## Supporting Information

**Title:** Investigation of Cobalt(III)-Phenylalanine Complexes for Hypoxia-activated Drug Delivery

**Author(s):** Isabela Cristina Aguiar de Souza,<sup>a</sup> Savyo de Souza Santana,<sup>a</sup> Javier G. Gómez,<sup>a</sup> Guilherme P. Guedes,<sup>a</sup> João Madureira,<sup>a</sup> Susana Maria de Ornelas Quintal<sup>a</sup> and Mauricio Lanznaster

### Syntheses of the Precursor Complexes

**[CoCl<sub>2</sub>(py<sub>2</sub>en)]ClO<sub>4</sub>:**<sup>1,2</sup> To a 30 mL of aqueous solution of Na<sub>3</sub>[Co(NO<sub>2</sub>)<sub>6</sub>] (4.0 mmol) was added the py<sub>2</sub>en (4.0 mmol) dissolved in 10 mL of water. The reaction mixture was kept at 80°C under magnetic stirring for 1 hour. The LiClO<sub>4</sub> (16.0 mmol) was added and the yellow precipitate of [Co(NO<sub>2</sub>)<sub>2</sub>(py<sub>2</sub>en)]ClO<sub>4</sub> was isolated by filtration, washed with diethyl ether and dried under vacuum (yield: 40 %). IR (ATR, 4000 – 600 cm<sup>-1</sup>): 3192 (N-H); 1613 - 1449 (C=C, C=N); 1412, 1341 (O-N=O); 1091 (Cl-O); 820 – 692 (aromatic C-H). ESI-MS (MeOH): m/z<sup>+</sup>= 393.11 for [Co(NO<sub>2</sub>)<sub>2</sub>(py<sub>2</sub>en)]<sup>+</sup> (calculated 393.07). The complex [Co(NO<sub>2</sub>)<sub>2</sub>(py<sub>2</sub>en)]ClO<sub>4</sub> (2.8 mmol) was dissolved in 58 mL of HCl 37% and heated up to 80° C for 3 hours. Then, 12 mL of HClO<sub>4</sub> 70% was added. The mixture was stirred for 30 minutes and cooled in an ice bath. The purple precipitate of [CoCl<sub>2</sub>(py<sub>2</sub>en)]ClO<sub>4</sub> was isolated by filtration, washed with diethyl ether and dried under vacuum (yield: 63 %). IR (ATR, 4000 – 600 cm<sup>-1</sup>): 3211 (N-H); 1610 - 1418 (C=C, C=N); 1085 (Cl-O); 812 – 690 (aromatic C-H). <sup>1</sup>H NMR (500 MHz, DMSO-d<sub>6</sub>) δ/ppm: 9.34 (d, J = 5.7 Hz, 1H, H<sub>1</sub>), 8.27 (td, J = 7.7, 1.3 Hz, 1H, H<sub>3</sub>), 8.02 (td, J = 7.7, 1.3 Hz, 1H, H<sub>2</sub>), 7.98 (b, NH), 7.85 (m, 2H, H<sub>2</sub> and H<sub>4</sub>), 7.69 (d, J = 7.7 Hz, 1H, H<sub>1</sub>'), 7.59 (b, NH'), 7.36 (t, J = 5.7 Hz, 1H, H<sub>3</sub>'), 6.86 (d, J = 5.7 Hz, 1H, H<sub>4</sub>'), 5.00 (dd, J = 17.5, 7.7 Hz, 1H, H<sub>5</sub>), 4.36 (d, J = 17.5 Hz, 1H, H<sub>5</sub>), 4.04 (d, J = 16.4, 7.7 Hz, 1H, H<sub>5</sub>'), 3.81 (dd, J = 16.4, 7.7 Hz, 1H, H<sub>5</sub>'), 3.66 (m,

<sup>1</sup> M. V. P. de Mello, G. Cebrián-Torrejón, J. R. Pereira, C. S. Moreira, C. B. S. M. R. Gomes, D. R. da Rocha, E. M. S. Fagundes, G. B. Ferreira and M. Lanznaster, *J. Inorg. Biochem.* 2019, **199**, 110756.

<sup>2</sup> R. C. Batista, F. S. Miranda, C. B. Pinheiro and M. Lanznaster, *Eur. J. Inorg. Chem.*, 2018, 612-616.

1H,  $H_7$ ), 3.13 (dd,  $J = 13.0, 4.1$  Hz, 1H,  $H_7$ ), 2.60 (m, 1H,  $H_7$ ), 2.20-2.27 (m, 1H,  $H_7$ ). ESI-MS (MeOH):  $m/z^+ = 371.11$  for  $[\text{CoCl}_2(\text{py}_2\text{en})]^+$  (calculated 371.02).

**$[\text{CoCl}_2(\text{tpa})]\text{ClO}_4$** <sup>3</sup> To a solution of  $[\text{Co}(\text{H}_2\text{O})_6]\text{Cl}_2$  (4.2 mmol) in 20 mL of methanol, was added a methanol solution (10 mL) of TPA (4.2 mmol) and solid  $\text{LiClO}_4$  (6.3 mmol) in inert atmosphere. Gaseous chlorine was slowly introduced into this solution under cooling for 15 min. The purple precipitate of  $[\text{CoCl}_2(\text{TPA})]\text{ClO}_4$  was isolated by filtration, washed with diethyl ether and dried under vacuum (yield: 63 %). IR (ATR, 4000 – 600  $\text{cm}^{-1}$ ): 1609 - 1417 (C=C, C=N); 1083 (Cl-O); 819 – 716 (aromatic C-H).  $^1\text{H}$  NMR (500 MHz,  $\text{DMSO-d}_6$ )  $\delta/\text{ppm}$ : 9.44 (d,  $J = 6.0$  Hz, 1H,  $H_{10}$ ), 9.01 (dd,  $J = 6.0, 0.7$  Hz, 2H,  $H_1$  and  $H_{1'}$ ), 8.07 (td,  $J = 7.7, 1.4$  Hz, 2H,  $H_3$  and  $H_{3'}$ ), 7.88 (td,  $J = 7.7, 1.4$  Hz, 1H,  $H_8$ ), 7.69 (d,  $J = 7.7$  Hz, 2H,  $H_4$  and  $H_{4'}$ ), 7.62-7.57 (m, 3H,  $H_2, H_{2'}$  and  $H_9$ ), 7.31 (dd,  $J = 7.7, 0.7$  Hz, 1H,  $H_7$ ), 5.60 (d,  $J = 15.8$  Hz, 2H,  $H_5$  and  $H_{5'}$ ), 5.17 (s, 2H,  $H_6$ ), 4.82 (d,  $J = 15.8$  Hz, 2H,  $H_5$  and  $H_{5'}$ ). ESI-MS (MeOH):  $m/z^+ = 419.03$  for  $[\text{CoCl}_2(\text{tpa})]^+$  (calculated 419.02).

**$[\text{CoCl}_2(\text{py}_2\text{enMe}_2)]\text{ClO}_4$** : To a solution of  $[\text{Co}(\text{H}_2\text{O})_6]\text{Cl}_2$  (3.3 mmol) in 20 mL of methanol, was added a methanol solution (10 mL) of  $\text{py}_2\text{enMe}_2$  (3.3 mmol) and solid  $\text{LiClO}_4$  (5.0 mmol) in inert atmosphere. Gaseous chlorine was slowly introduced into this solution under cooling for 15 min. The green precipitate of  $[\text{CoCl}_2(\text{py}_2\text{enMe}_2)]\text{ClO}_4$  was isolated by filtration, washed with diethyl ether and dried under vacuum (yield: 67 %). IR (ATR, 4000 – 600  $\text{cm}^{-1}$ ): 1615 - 1418 (C=C, C=N); 1081 (Cl-O); 817 – 722 (aromatic C-H).  $^1\text{H}$  NMR (500 MHz,  $\text{DMSO-d}_6$ )  $\delta/\text{ppm}$ : 9.32 (d,  $J = 5.8$  Hz, 2H,  $H_1$  and  $H_{1'}$ ), 8.19 (td,  $J = 7.6, 1.3$  Hz, 2H,  $H_3$  and  $H_{3'}$ ), 7.75 (m, 4H,  $H_2, H_{2'}, H_4$  and  $H_{4'}$ ), 4.82 (d,  $J = 16.0$  Hz, 2H,  $H_5$  and  $H_{5'}$ ), 4.02 (d,  $J = 16.0$  Hz, 2H,  $H_5$  and  $H_{5'}$ ), 2.89 (d,  $J = 9.6$  Hz, 2H,  $H_7$  and  $H_{7'}$ ), 2.56 (d,  $J = 9.6$  Hz, 2H,  $H_7$  and  $H_{7'}$ ), 2.25 (s, 6H,  $\text{CH}_3$  and  $\text{CH}_{3'}$ ). ESI-MS (MeOH):  $m/z^+ = 399.14$  for  $[\text{CoCl}_2(\text{py}_2\text{enMe}_2)]^+$  (calculated 399.06).

**$[\text{Co}(\text{bipy})_2\text{Cl}_2]\text{Cl}$** : To a solution of  $[\text{Co}(\text{H}_2\text{O})_6]\text{Cl}_2$  (4.2 mmol) in 30 mL of methanol, was added solid 2,2'-bipyridine (8.4 mmol) and solid  $\text{LiCl}$  (23.6 mmol) in inert atmosphere. Gaseous chlorine was slowly introduced into this solution under cooling for 15 min. The resulting precipitate was filtered off and redissolved in methanol on a water

<sup>3</sup> A. A. Vlcek, Inorg. Chem., 1967, 6, 1425 – 1427.

bath and the methanol was slowly evaporated to half of the solution. The slow evaporation of the solution at room temperature resulted in the formation of violet crystals of  $[\text{Co}(\text{bipy})_2\text{Cl}_2]\text{Cl}$  that were isolated by filtration, washed with diethyl ether and dried under vacuum (yield: 60 %). IR (ATR, 4000 – 600  $\text{cm}^{-1}$ ): 1603, 1424 (C=C, C=N); 803 - 726 (aromatic C-H).  $^1\text{H}$  NMR (500 MHz,  $\text{DMSO-d}_6$ )  $\delta/\text{ppm}$ : 9.84 (dd,  $J = 5.8, 0.8$  Hz, 2H,  $H_1$  and  $H_{1'}$ ), 8.95 (d,  $J = 7.7$  Hz, 2H,  $H_4$  and  $H_{4'}$ ), 8.79 (d,  $J = 7.7$  Hz, 2H,  $H_8$  and  $H_{8'}$ ), 8.64 (td,  $J = 7.7, 1.3$  Hz, 2H,  $H_3$  and  $H_{3'}$ ), 8.26 (td,  $J = 7.7, 1.3$  Hz, 2H,  $H_7$  and  $H_{7'}$ ), 8.20 (td,  $J = 7.7, 1.3$ , 2H,  $H_2$  and  $H_{2'}$ ), 7.51 (td,  $J = 7.7, 1.3$  Hz, 2H,  $H_6$  and  $H_{6'}$ ), 7.34 (d,  $J = 5.8, 0.8$  Hz, 2H,  $H_5$  and  $H_{5'}$ ). ESI-MS (MeOH):  $m/z^+ = 441.12$  for  $[\text{Co}(\text{bipy})_2\text{Cl}_2]^+$  (calculated 441.01).

**Table S1.** Crystallographic data of cobalt(III)-phenylalanine complexes.

| Complexes                                  | 1                                                                                                          | 2                                                                                     | 3                                                                                     | 4                                                                                                                     |
|--------------------------------------------|------------------------------------------------------------------------------------------------------------|---------------------------------------------------------------------------------------|---------------------------------------------------------------------------------------|-----------------------------------------------------------------------------------------------------------------------|
| Empirical formula                          | C <sub>23</sub> H <sub>28</sub> CoN <sub>5</sub> O <sub>2</sub> ·2(ClO <sub>4</sub> )                      | C <sub>27</sub> H <sub>28</sub> CoN <sub>5</sub> O <sub>2</sub> ·2(ClO <sub>4</sub> ) | C <sub>25</sub> H <sub>32</sub> CoN <sub>5</sub> O <sub>2</sub> ·2(ClO <sub>4</sub> ) | C <sub>29</sub> H <sub>26</sub> CoN <sub>5</sub> O <sub>2</sub> ·2(ClO <sub>4</sub> )·C <sub>2</sub> H <sub>3</sub> N |
| Formula weight                             | 664.33                                                                                                     | 712.37                                                                                | 692.38                                                                                | 775.43                                                                                                                |
| Crystal system                             | Triclinic                                                                                                  | Orthorhombic                                                                          | Orthorhombic                                                                          | Monoclinic                                                                                                            |
| Space group                                | P1                                                                                                         | P2 <sub>1</sub> 2 <sub>1</sub> 2 <sub>1</sub>                                         | P2 <sub>1</sub> 2 <sub>1</sub> 2 <sub>1</sub>                                         | P2 <sub>1</sub>                                                                                                       |
| Temperature (K)                            | 273                                                                                                        | 290                                                                                   | 298                                                                                   | 273                                                                                                                   |
| Unit cell dimensions (Å, °)                | a = 6.5320 (11)<br>b = 9.9881 (18)<br>c = 11.068 (2)<br>α = 71.076 (6)<br>β = 86.884 (5)<br>γ = 89.537 (5) | a = 12.5779 (3)<br>b = 15.3268 (4)<br>c = 16.0033 (5)<br>α = 90<br>β = 90<br>γ = 90   | a = 10.4694 (3)<br>b = 12.8698 (5)<br>c = 22.5611 (8)<br>α = 90<br>β = 90<br>γ = 90   | a = 12.5559 (6)<br>b = 9.9926 (4)<br>c = 14.5754 (7)<br>β = 113.235 (2)                                               |
| Volume (Å <sup>3</sup> )                   | 682.0 (2)                                                                                                  | 3085.10 (15)                                                                          | 3039.86 (18)                                                                          | 1680.40 (13)                                                                                                          |
| Z                                          | 1                                                                                                          | 4                                                                                     | 4                                                                                     | 2                                                                                                                     |
| θ max                                      | 26.4°                                                                                                      | 26.2°                                                                                 | 26.5°                                                                                 | 25.5°                                                                                                                 |
| Absorption coefficient (mm <sup>-1</sup> ) | 0.89                                                                                                       | 0.79                                                                                  | 0.80                                                                                  | 0.74                                                                                                                  |
| Reflections collected                      | 46056                                                                                                      | 37755                                                                                 | 20827                                                                                 | 61651                                                                                                                 |
| Independent reflections                    | 5340                                                                                                       | 6303                                                                                  | 6235                                                                                  | 5921                                                                                                                  |
| Reflections observed [I > 2σ(I)]           | 5303                                                                                                       | 5292                                                                                  | 5029                                                                                  | 5337                                                                                                                  |
| R <sub>int</sub>                           | 0.023                                                                                                      | 0.070                                                                                 | 0.045                                                                                 | 0.040                                                                                                                 |
| R[F <sup>2</sup> > 2σF <sup>2</sup> ]      | 0.025                                                                                                      | 0.057                                                                                 | 0.051                                                                                 | 0.040                                                                                                                 |
| wR(F <sup>2</sup> )                        | 0.066                                                                                                      | 0.164                                                                                 | 0.145                                                                                 | 0.108                                                                                                                 |
| S                                          | 1.04                                                                                                       | 1.07                                                                                  | 1.04                                                                                  | 1.09                                                                                                                  |
| Parameters                                 | 370                                                                                                        | 406                                                                                   | 390                                                                                   | 452                                                                                                                   |

**Table S2.** Conformers ensemble energy of two most stable isomers of complexes **1** – **4** and differential stabilization in competing isomers ( $E_{\text{NCI}}$ ) of cation-anion interactions in simulated solution.

| Complex                                                                                       | Condition | Isomer 1 Candidate        |             | Isomer 2 Candidate        |             | $E_{\text{NCI}}$ surplus stabilization |                         |
|-----------------------------------------------------------------------------------------------|-----------|---------------------------|-------------|---------------------------|-------------|----------------------------------------|-------------------------|
|                                                                                               |           |                           | Energy (Eh) |                           | Energy (Eh) | kJ/mol                                 | Assigned isomer         |
| [Co(Phe)(py <sub>2</sub> en)](ClO <sub>4</sub> ) <sub>2</sub><br>( <b>1</b> )                 | NAWS      | $\Lambda$ -cis $\alpha$ - | -88.98947   | $\Delta$ -cis $\beta_1$ - | -88.98412   | 23.6                                   | $\Delta$ -cis $\beta_1$ |
|                                                                                               | WAWS      | <i>exo,exo</i>            | -130.85765  | <i>exo,exo</i>            | -130.86113  |                                        |                         |
| [Co(Phe)(tpa)](ClO <sub>4</sub> ) <sub>2</sub><br>( <b>2</b> )                                | NAWS      | $\beta_1$                 | -97.54474   | $\beta_2$                 | -97.54182   | 11.7                                   | $\beta_1$               |
|                                                                                               | WAWS      |                           | -139.41860  |                           | -139.41122  |                                        |                         |
| [Co(Phe)(py <sub>2</sub> enMe <sub>2</sub> )](ClO <sub>4</sub> ) <sub>2</sub><br>( <b>3</b> ) | NAWS      | $\Lambda$ -cis $\alpha$ - | -95.27150   | $\Delta$ -cis $\alpha$ -  | -95.26814   | 8.8                                    | $\Delta$ -cis $\alpha$  |
|                                                                                               | WAWS      | <i>exo,exo</i>            | -137.14090  | <i>exo,exo</i>            | -137.14090  |                                        |                         |
| [Co(Phe)(bipy) <sub>2</sub> ](ClO <sub>4</sub> ) <sub>2</sub><br>( <b>4</b> )                 | NAWS      | $\Lambda$                 | -100.81285  | $\Delta$                  | -100.81009  | 5.1                                    | $\Delta$                |
|                                                                                               | WAWS      |                           | -142.68309  |                           | -142.68229  |                                        |                         |

<sup>†</sup> At 298.15 K, 1 bar and 1 mol/dm<sup>3</sup> with water as implicit solvent (SMD).

**Table S3** –  $^1\text{H}$  and  $^{13}\text{C}$  Chemical shielding and chemical Shift (ppm) for the TMS reference and Internal Calibrators Na(Phe) and  $\text{py}_2\text{enMe}_2$  in DMSO (SMD) at B97-3c (D4) // RI-B972-D3/pcSseg-1

**TMS:** Chemical Shielding (ppm) - C – 187,341; H – 31,668

**Py<sub>2</sub>enMe<sub>2</sub>**

|                                       | Chem shielding (ppm) | $\delta$ (ppm) |       |      |
|---------------------------------------|----------------------|----------------|-------|------|
|                                       |                      | Calc.          | Corr. | Exp. |
| C <sub>1/1'</sub> (py)                | 31.492               |                |       |      |
| C <sub>2/2'</sub> (py)                | 60.798               |                |       |      |
| C <sub>3/3'</sub> (py)                | 44.490               |                |       |      |
| C <sub>4/4'</sub> (py)                | 59.857               |                |       |      |
| C <sub>4a/4a'</sub> (py)              | 19.345               |                |       |      |
| C <sub>5/5'</sub> (CH <sub>2</sub> )  | 121.998              |                |       |      |
| C <sub>6/6'</sub> (Me)                | 140.566              |                |       |      |
| C <sub>7/7'</sub> (en)                | 136.324              |                |       |      |
|                                       |                      |                |       |      |
|                                       | Chem shielding (ppm) | $\delta$ (ppm) |       |      |
|                                       |                      | Calc.          | Corr. | Exp. |
| H <sub>1/1'</sub> (py)                | 22.875               | 8.79           | 8.39  | 8.46 |
| H <sub>2/2'</sub> (py)                | 24.173               | 7.50           | 7.15  | 7.21 |
| H <sub>3/3'</sub> (py)                | 23.565               | 8.10           | 7.73  | 7.71 |
| H <sub>4/4'</sub> (py)                | 23.798               | 7.87           | 7.51  | 7.40 |
| H <sub>5/5'</sub> (CH <sub>2</sub> )  | 27.964               | 3.70           | 3.71  | 3.62 |
| H <sub>6/6'</sub> (NCH <sub>3</sub> ) | 29.563               | 2.10           | 2.11  | 2.19 |
| H <sub>7/7'</sub> (en)                | 29.068               | 2.60           | 2.60  | 2.56 |

Scale factors – aromatic (0.954), aliphatic (1.001)

|                                        | Chem shielding (ppm) | $\delta$ (ppm) |              |                        |
|----------------------------------------|----------------------|----------------|--------------|------------------------|
|                                        |                      | Calc (DMSO)    | Corr. (DMSO) | Exp (D <sub>2</sub> O) |
| H <sub>c</sub> (CH-phe)                | 28.315               | 3.35           | 3.42         | 3.56                   |
| H <sub>d</sub> (CH <sub>2</sub> -phe)  | 28.818               | 2.85           | 2.90         | 2.90                   |
| H <sub>d'</sub> (CH <sub>2</sub> -phe) | 28.548               | 3.12           | 3.18         | 3.05                   |
| H <sub>e/i</sub> (Ph)                  | 24.126               | 7.69           | 7.33         | 7.33                   |
| H <sub>f/h</sub> (Ph)                  | 23.959               | 7.76           | 7.40         | 7.42                   |
| H <sub>g</sub> (Ph)                    | 23.941               | 7.73           | 7.36         | 7.34                   |

Scale factors – aromatic (0.953), aliphatic (1.019)

**Table S4** - Complex [Co(Phe)(py<sub>2</sub>en)](ClO<sub>4</sub>)<sub>2</sub>, **1**, <sup>1</sup>H-NMR chemical shift in DMSO-d<sub>6</sub>: calculated and experimental (for assigned structures).

|                                         | Calc.<br>(ppm)                     | Exp.<br>(ppm)                      | $\Delta_\delta$<br>(ppm) | Calc.<br>(ppm)                              | Exp.<br>(ppm)                               | $\Delta_\delta$<br>(ppm)   | Calc.<br>(ppm)                               | Calc.<br>(ppm)                                |
|-----------------------------------------|------------------------------------|------------------------------------|--------------------------|---------------------------------------------|---------------------------------------------|----------------------------|----------------------------------------------|-----------------------------------------------|
|                                         | $\Lambda$ -cisa-<br><i>exo,exo</i> | $\Lambda$ -cisa-<br><i>exo,exo</i> |                          | $\Delta$ -cis $\beta_1$ -<br><i>exo,exo</i> | $\Delta$ -cis $\beta_1$ -<br><i>exo,exo</i> |                            | $\Lambda$ -cis $\beta_1$ -<br><i>exo,exo</i> | $\Lambda$ -cis $\beta_1$ -<br><i>endo,exo</i> |
| H1 (py)                                 | 7.55                               | 7.87-<br>7.78                      | $\approx -0.28$          | 8.29                                        | 7.87-<br>7.79                               | $\approx +0.46$            | 7.06                                         | 7.58                                          |
| H2 (py)                                 | 7.22                               | 8.19-<br>8.16                      | $\approx -0.96$          | 7.83                                        | 8.19-<br>8.16                               | $\approx -0.34$            | 7.11                                         | 7.32                                          |
| H3 (py)                                 | 8.04                               | 7.54                               | +0.50                    | 8.33                                        | 7.48                                        | +0.85                      | 8.10                                         | 8.14                                          |
| H4 (py)                                 | 7.61                               | 7.01                               | +0.60                    | 7.80                                        | 6.67                                        | +1.13                      | 7.66                                         | 7.66                                          |
| H5<br>(CH <sub>2</sub> )                | 4.47,<br>4.90                      | 4.19,<br>4.63                      | +0.28,<br>+0.27          | 3.75,<br>4.73                               | 4.03,<br>4.37-<br>4.30                      | -0.28, $\approx$<br>+0.39  | 3.71,<br>4.74                                | 4.14, 4.83                                    |
| H6 (NH)                                 | – <sup>§</sup>                     | 7.59                               | – <sup>§</sup>           | – <sup>§</sup>                              | 7.16                                        | – <sup>§</sup>             | – <sup>§</sup>                               | – <sup>§</sup>                                |
| H7 (en)                                 | 2.41,<br>3.01                      | 2.56,<br>3.56                      | -0.15, -<br>0.55         | 1.81,<br>3.21                               | 2.12,<br>3.87                               | -0.31, -<br>0.66           | 2.14,<br>3.44                                | 3.16, 3.53                                    |
| H7' (en)                                | 2.34,<br>3.07                      | 2.12,<br>2.85                      | +0.22,<br>+0.22          | 2.75,<br>2.89                               | n.i., 3.12                                  | –, -0.23                   | 3.61,<br>3.78                                | 2.66, 3.99                                    |
| H6'<br>(NH)                             | – <sup>§</sup>                     | 7.59                               | – <sup>§</sup>           | – <sup>§</sup>                              | 7.44                                        | – <sup>§</sup>             | – <sup>§</sup>                               | – <sup>§</sup>                                |
| H5'<br>(CH <sub>2</sub> )               | 4.58,<br>5.21                      | 4.01,<br>4.31                      | +0.57,<br>+0.90          | 3.86,<br>4.21                               | 4.37-<br>4.30,<br>4.77                      | $\approx -0.48$ ,<br>-0.56 | 4.69,<br>4.93                                | 4.59, 4.77                                    |
| H4' (py)                                | 7.78                               | 7.90                               | -0.12                    | 7.65                                        | 7.87-<br>7.79                               | $\approx -0.18$            | 7.75                                         | 7.75                                          |
| H3' (py)                                | 8.24                               | 8.28                               | -0.04                    | 8.11                                        | 8.19-<br>8.16                               | $\approx -0.06$            | 8.13                                         | 8.14                                          |
| H2' (py)                                | 7.80                               | 8.33                               | -0.53                    | 7.41                                        | 7.87-<br>7.79                               | $\approx -0.42$            | 7.37                                         | 7.42                                          |
| H1' (py)                                | 8.46                               | 7.87-<br>7.78                      | $\approx +0.64$          | 6.94                                        | 8.31                                        | -1.37                      | 6.65                                         | 6.86                                          |
| NH <sub>2</sub> -<br>phe                | – <sup>§</sup>                     | 5.20,<br>5.42                      | – <sup>§</sup>           | – <sup>§</sup>                              | 4.60,<br>5.88                               | – <sup>§</sup>             | – <sup>§</sup>                               | – <sup>§</sup>                                |
| H $\alpha$ (CH-<br>phe)                 | 3.94                               | 2.77                               | +1.17                    | 4.06                                        | 3.40                                        | +0.66                      | 3.96                                         | 3.95                                          |
| H $\beta$<br>(CH <sub>2</sub> -<br>phe) | 2.90,<br>3.54                      | 2.98,<br>3.24                      | -0.08,<br>+0.30          | 3.09,<br>3.79                               | n.i.                                        | -                          | 2.94,<br>3.65                                | 2.82, 3.51                                    |
| H2/H6<br>(Ph)                           | 7.05                               | 7.29-<br>7.18                      | -0.19                    | 7.51                                        | 7.36-<br>7.32                               | +0.17                      | 7.17                                         | 6.99                                          |
| H3/H5<br>(Ph)                           | 7.06                               | 7.29-<br>7.18                      | -0.18                    | 7.73                                        | 7.36-<br>7.32                               | +0.39                      | 7.30                                         | 7.04                                          |
| H4 (Ph)                                 | 7.11                               | 7.29-<br>7.18                      | -0.13                    | 7.70                                        | 7.36-<br>7.32                               | +0.36                      | 7.44                                         | 7.09                                          |

<sup>§</sup> - NMR calculations do not correctly determine exchangeable protons.

**Table S5** - Complex [Co(Phe)(tpa)](ClO<sub>4</sub>)<sub>2</sub>, **2**, <sup>1</sup>H-NMR chemical shift in DMSO-d<sub>6</sub>: calculated and experimental (for assigned structure).

|                                  | Calc. (ppm)    | Exp. (ppm)      | $\Delta\delta$ (ppm)             | Calc. (ppm)    |
|----------------------------------|----------------|-----------------|----------------------------------|----------------|
|                                  | $\beta_1$      | $\beta_1$       |                                  | $\beta_2$      |
| H1 (py)                          | 8.32           | 8.26            | +0.06                            | 8.37           |
| H2 (py)                          | 7.55           | 7.66            | -0.11                            | 7.61           |
| H3 (py)                          | 8.09           | 8.16            | -0.07                            | 8.13           |
| H4 (py)                          | 7.68           | 7.80            | -0.12                            | 7.72           |
| H5 (CH <sub>2</sub> )            | 5.13, 5.01     | 5.43, 5.10-5.00 | -0.30, $\approx$ -0.04           | 5.53, 5.03     |
| H1' (py)                         | 7.74           | 8.10            | -0.36                            | 6.58           |
| H2' (py)                         | 7.19           | 7.57            | -0.38                            | 6.98           |
| H3' (py)                         | 7.97           | 8.14            | -0.17                            | 7.85           |
| H4' (py)                         | 7.58           | 7.80            | -0.22                            | 7.54           |
| H5' (CH <sub>2</sub> )           | 4.96, 4.63     | 5.33, 5.10-5.00 | -0.37; $\approx$ -0.42           | 5.52, 4.92     |
| H6 (CH <sub>2</sub> )            | 5.02, 4.76     | 5.10-5.00       | $\approx$ -0.03, $\approx$ -0.29 | 5.08, 5.02     |
| H7 (py)                          | 7.20           | 7.34            | -0.14                            | 7.19           |
| H8 (py)                          | 7.86           | 7.97            | -0.11                            | 7.86           |
| H9 (py)                          | 7.57           | 7.70            | -0.13                            | 7.57           |
| H10 (py)                         | 9.10           | 9.06            | +0.04                            | 8.36           |
| NH <sub>2</sub> -phe             | - <sup>§</sup> | 6.23, 4.86      | - <sup>§</sup>                   | - <sup>§</sup> |
| H $\alpha$ (CH-phe)              | 3.58           | 3.35            | +0.23                            | 3.91           |
| H $\beta$ (CH <sub>2</sub> -phe) | 3.53, 2.75     | 3.00-2.85       | +0.61, -0.10                     | 3.80, 3.23     |
| H2/H6 (Ph)                       | 7.07           | 7.16            | +0.09                            | 7.68           |
| H3/H5 (Ph)                       | 7.06           | 7.16            | +0.10                            | 7.71           |
| H4 (Ph)                          | 7.05           | 7.16            | -0.11                            | 7.42           |

<sup>§</sup> - NMR calculations do not correctly determine exchangeable protons.



**Table S6** - Complex [Co(Phe)(py<sub>2</sub>enMe<sub>2</sub>)](ClO<sub>4</sub>)<sub>2</sub>, **3**, <sup>1</sup>H-NMR chemical shift in DMSO-d<sub>6</sub>: calculated and experimental (for assigned structures).

|                                      | Calc. (ppm)                 | Exp. (ppm)                  | $\Delta\delta$ (ppm)      | Calc. (ppm)                | Exp. (ppm)                 | $\Delta\delta$ (ppm) |
|--------------------------------------|-----------------------------|-----------------------------|---------------------------|----------------------------|----------------------------|----------------------|
|                                      | $\Lambda$ -cisa-<br>exo,exo | $\Lambda$ -cisa-<br>exo,exo |                           | $\Delta$ -cisa-<br>exo,exo | $\Delta$ -cisa-<br>exo,exo |                      |
| H1 (py)                              | 7.72                        | 8.13                        | -0.41                     | 7.10                       | 8.56                       | -1.46                |
| H2 (py)                              | 7.18                        | 7.66                        | -0.48                     | 7.14                       | 7.52                       | -0.38                |
| H3 (py)                              | 8.09                        | 8.25                        | -0.16                     | 8.02                       | 8.20                       | -0.18                |
| H4 (py)                              | 7.67                        | 7.92-7.85                   | $\approx$ -0.22           | 7.66                       | 7.83                       | -0.17                |
| H5 (CH <sub>2</sub> )                | 4.24, 4.46                  | 4.46-4.36                   | -0.17,<br>+0.05           | 4.44, 4.93                 | n.i.                       | -                    |
| H6 (NMe)                             | 2.58                        | 2.56                        | +0.02                     | 2.55                       | 2.53                       | +0.02                |
| H7 (en)                              | 2.55, 2.76                  | 2.64, 2.85                  | -0.09, -<br>0.09          | 2.54, 2.78                 | 2.64, 2.87                 | -0.10, -<br>0.09     |
| H7' (en)                             | 2.67, 2.83                  | 2.85 (both)                 | -0.18, -<br>0.02          | 2.68, 2.77                 | 2.64, 2.87                 | +0.04, -<br>0.10     |
| H6' (NMe)                            | 2.36                        | 2.33                        | +0.03                     | 2.39                       | 2.38                       | +0.01                |
| H5' (CH <sub>2</sub> )               | 4.51, 4.84                  | 4.46-4.36,<br>4.74          | $\approx$ +0.10,<br>+0.10 | 4.54, 4.58                 | 4.38, 4.83                 | +0.16, -<br>0.26     |
| H4' (py)                             | 7.81                        | 7.92-7.85                   | $\approx$ -0.07           | 7.84                       | n.i.                       | -                    |
| H3' (py)                             | 8.30                        | 8.32                        | -0.02                     | 8.31                       | n.i.                       | -                    |
| H2' (py)                             | 7.86                        | 7.92-7.85                   | $\approx$ -0.02           | 7.85                       | n.i.                       | -                    |
| H1' (py)                             | 8.52                        | 9.02                        | -0.50                     | 8.49                       | 8.31                       | +0.18                |
| NH <sub>2</sub> -phe                 | - <sup>§</sup>              | 4.06, 6.93                  | - <sup>§</sup>            | - <sup>§</sup>             | 4.72, 6.03                 | - <sup>§</sup>       |
| H $\alpha$ (CH-<br>phe)              | 3.63                        | 3.45                        | +0.18                     | 2.91                       | 3.14                       | -0.23                |
| H $\beta$ (CH <sub>2</sub> -<br>phe) | 2.76, 3.39                  | 2.90 (both)                 | -0.14,<br>+0.49           | 2.74, 3.50                 | 2.82                       | -0.08,<br>+0.68      |
| H2/H6<br>(Ph)                        | 6.94                        | 7.24-7.12                   | $\approx$ -0.01           | 7.18                       | 7.24-7.12                  | $\approx$ -0.00      |
| H3/H6<br>(Ph)                        | 7.06                        | 7.24-7.12                   | $\approx$ -0.12           | 7.34                       | 7.24-7.12                  | $\approx$ +0.16      |
| H4 (Ph)                              | 7.17                        | 7.24-7.12                   | $\approx$ -0.01           | 7.53                       | 7.24-7.12                  | $\approx$ +0.35      |

<sup>§</sup> - NMR calculations do not correctly determine exchangeable protons.

**Table S7** - Complex [Co(bipy)<sub>2</sub>(Phe)](ClO<sub>4</sub>)<sub>2</sub>, **4**, <sup>1</sup>H-NMR chemical shift in DMSO-d<sub>6</sub>: calculated and experimental (for assigned structure).

|                                       | Calc. (ppm)    | Exp. (ppm) | Δ <sub>δ</sub> (ppm) | Calc. (ppm)    |
|---------------------------------------|----------------|------------|----------------------|----------------|
|                                       | Λ              | Λ          |                      | Δ              |
| H1 (py)                               | 8.72           | 9.28       | -0.56                | 8.59           |
| H2 (py)                               | 8.10           | 8.21       | -0.11                | 8.07           |
| H3 (py)                               | 8.61           | 8.68       | -0.07                | 8.64           |
| H4 (py)                               | 8.69           | 8.97       | -0.28                | 8.77           |
| H5 (py)                               | 8.54           | 6.98       | +1.56                | 8.63           |
| H6 (py)                               | 8.27           | 7.59       | +0.68                | 8.34           |
| H7 (py)                               | 7.35           | 8.38-8.35  | ≈ -1.02              | 7.44           |
| H8 (py)                               | 6.69           | 8.84       | -2.15                | 7.28           |
| H1' (py)                              | 7.72           | 8.38-8.35  | ≈ -0.64              | 6.77           |
| H2' (py)                              | 7.32           | 8.09       | -0.77                | 7.33           |
| H3' (py)                              | 8.40           | 8.68       | -0.28                | 8.35           |
| H4' (py)                              | 8.57           | 8.97       | -0.40                | 8.55           |
| H5' (py)                              | 8.56           | 7.65       | +0.91                | 8.49           |
| H6' (py)                              | 8.33           | 7.65       | +0.68                | 8.28           |
| H7' (py)                              | 7.52           | 8.38-8.35  | ≈ -0.85              | 7.43           |
| H8' (py)                              | 7.54           | 8.84       | -1.30                | 7.04           |
| NH <sub>2</sub> -phe                  | - <sup>§</sup> | 7.15, 5.34 | - <sup>§</sup>       | - <sup>§</sup> |
| H <sub>α</sub> (CH-phe)               | 3.97           | 4.13       | -0.16                | 3.27           |
| H <sub>β</sub> (CH <sub>2</sub> -phe) | 3.44, 2.80     | 3.12, 2.81 | +0.32, -0.01         | 3.56, 2.73     |
| H2/H6 (Ph)                            | 6.94           | 7.30-7.25  | ≈ -0.34              | 7.68           |
| H3/H5 (Ph)                            | 7.13           | 7.30-7.25  | ≈ -0.14              | 7.71           |
| H4 (Ph)                               | 7.30           | 7.30-7.25  | ≈ +0.02              | 7.42           |

<sup>§</sup> - NMR calculations do not correctly determine exchangeable protons

**Table S8** -  $^1\text{H}$  NMR (500 MHz,  $\delta/\text{ppm}$ ) assignments for complexes **1-4** in  $\text{DMSO-}d_6$ .

|                                                                                                                                                                                                                            |                                                                                                                                                                                                                                                                                                                                                                                                                                                                                                                                                                                                                                                                                                                                                                                                                                                                                                                                       |
|----------------------------------------------------------------------------------------------------------------------------------------------------------------------------------------------------------------------------|---------------------------------------------------------------------------------------------------------------------------------------------------------------------------------------------------------------------------------------------------------------------------------------------------------------------------------------------------------------------------------------------------------------------------------------------------------------------------------------------------------------------------------------------------------------------------------------------------------------------------------------------------------------------------------------------------------------------------------------------------------------------------------------------------------------------------------------------------------------------------------------------------------------------------------------|
| 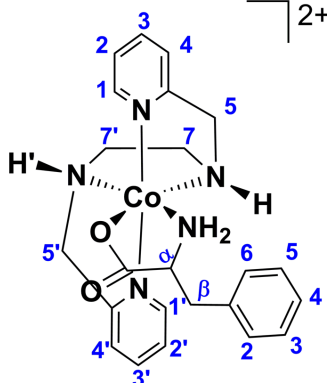 <p>[Co(Phe)(py<sub>2</sub>en)]<sup>2+</sup> (<b>1</b>)<br/>Isomer <math>\Delta</math>-cis<math>\alpha</math>-exo-exo</p>                 | <p>8.33 (td, 7.8 Hz, 1.4 Hz, 1H, <math>H_{2'}</math>), 8.28 (m, 1H, <math>H_{3'}</math>), 8.19-8.16 (m, 1H, <math>H_2</math>), 7.90 (d, 7.8 Hz, 1H, <math>H_{4'}</math>), 7.87-7.78 (m, 2H, <math>H_1</math>, <math>H_{1'}</math>), 7.59 (b, 1H, NH), 7.54 (t, 6.4 Hz, 1H, <math>H_3</math>), 7.29-7.18 (m, 5H, <math>H_2</math>-<math>H_6</math>-Phen), 7.59 (overlap, NH'), 7.01 (d, 5.4 Hz, 1H, <math>H_4</math>), 5.42 (t, 9.0 Hz, 1H, <math>NH_2</math>), 5.20 (t, 10.2 Hz, 1H, <math>NH_2</math>), 4.63 (dd, 16.6, 6.3 Hz, 1H, <math>H_5</math>), 4.31 (m, 1H, <math>H_{5'}</math>), 4.19 (d, 16.6 Hz, 1H, <math>H_5</math>), 4.01 (m, 1H, <math>H_{5'}</math>), 3.56 (m, 1H, <math>H_7</math>), 3.24 (overlap, <math>H_\beta</math>), 2.98 (m, 1H, <math>H_\beta</math>), 2.85 (m, 1H, <math>H_7</math>), 2.77 (m, 1H, <math>H_\alpha</math>), 2.56 (m, 1H, <math>H_7</math>), 2.12 (m, 1H, <math>H_7</math>).</p>             |
|  <p>[Co(Phe)(py<sub>2</sub>en)]<sup>2+</sup> (<b>1</b>)<br/>Isomer <math>\Delta</math>-cis<math>\beta</math>1-exo-exo</p>                | <p>8.31 (m, 1H, <math>H_{1'}</math>), 8.19-8.16 (m, 2H, <math>H_2</math>, <math>H_{3'}</math>), 7.87-7.79 (m, 3H, <math>H_1</math>, <math>H_{2'}</math> and <math>H_{4'}</math>), 7.48 (t, 6.5 Hz, 1H, <math>H_3</math>), 7.44 (br, 1H, NH'), 7.36-7.32 (m, 5H, <math>H_2</math>-<math>H_6</math>-Phen), 7.16 (br, NH), 6.67 (d, 5.5 Hz, 1H, <math>H_4</math>), 5.88 (t, 9.0 Hz, 1H, <math>NH_2</math>), 4.77 (dd, 17.6, 6.2 Hz, 1H, <math>H_{5'}</math>), 4.60 (m, 1H, <math>NH_2</math>), 4.37-4.30 (m, <math>H_5</math>, <math>H_{5'}</math>), 4.03 (dd, 17.4, 9.4 Hz, <math>H_5</math>), 3.87 (m, 1H, <math>H_7</math>), ( 3.40 (m, 1H, <math>H_\alpha</math>), 3.12 (m, 1H, <math>H_7</math>), 2.12 (m, 1H, <math>H_7</math>). <math>H_{6s}</math> and <math>H_{7'}</math> could not be identified.</p>                                                                                                                          |
|  <p>[Co(Phe)(TPA)]<sup>2+</sup> (<b>2</b>)</p>                                                                                          | <p>9.06 (d, 5.4 Hz, 1H, <math>H_{10}</math>), 8.26 (d, 5.4 Hz, 1H, <math>H_1</math>), 8.16 (td, 7.7, 1.4 Hz, 1H, <math>H_3</math>), 8.14 (td, 7.7, 1.4 Hz, 1H, <math>H_{3'}</math>), 8.10 (d, 5.4 Hz, 1H, <math>H_{1'}</math>), 7.97 (td, 7.7, 1.4 Hz, 1H, <math>H_8</math>), 7.80 (t, 7.7 Hz, 2H, <math>H_4</math> and <math>H_{4'}</math>), 7.70 (t, 7.7 Hz, 1H, <math>H_9</math>), 7.66 (t, 7.7 Hz, 1H, <math>H_2</math>), 7.57 (t, 7.7 Hz, 1H, <math>H_{2'}</math>), 7.34 (d, 7.7 Hz, 1H, <math>H_7</math>), 7.16 (m, 5H, <math>H_2</math>-<math>H_6</math>-Phen), 6.23 (t, 8.8 Hz, 1H, <math>NH_2</math>), 5.43 (d, 16.6 Hz, 1H, <math>H_5</math>), 5.33 (d, 16.6 Hz, 1H, <math>H_{5'}</math>), 5.10-5.00 (m, 4H, <math>H_6</math>, <math>H_5</math> and <math>H_{5'}</math>), 4.86 (t, 8.8 Hz, 1H, <math>NH_2</math>), 3.35 (t, 5.5 Hz, 1H, <math>H_\alpha</math>), 3.00-2.85 (qd, 15.0, 5.5 Hz, 2H, <math>H_\beta</math>).</p> |
|  <p>[Co(Phe)(py<sub>2</sub>enMe<sub>2</sub>)]<sup>2+</sup> (<b>3</b>)<br/>Isomer <math>\Delta</math>-cis<math>\alpha</math>-exo-exo</p> | <p>9.02 (d, 5.8 Hz, 1H, <math>H_{1'}</math>), 8.32 (td, 7.7, 1.0 Hz, 1H, <math>H_{3'}</math>), 8.25 (m, 1H, <math>H_3</math>), 8.13 (d, 5.4 Hz, 1H, <math>H_1</math>), 7.92 -7.85 (m, 3H, <math>H_{2'}</math>, <math>H_4</math> and <math>H_{4'}</math>), 7.66 (ddd, 7.7, 6.2, 1.0 Hz, 1H, <math>H_2</math>), 7.24-7.12 (m, 5H, <math>H_2</math>-<math>H_6</math>-Phen), 6.93 (t, 10.4 Hz, 1H, <math>NH_2</math>), 4.74 (d, 16.3 Hz, 1H, <math>H_{5'}</math>), 4.46-4.36 (m, 3H, <math>H_{5'}</math>, 2<math>H_5</math>), 4.06 (t, 10.4 Hz, 1H, <math>NH_2</math>), 3.45 (m, 1H, <math>H_\alpha</math>), 2.90 (m, 2H, <math>H_\beta</math>), 2.85 (m, 3H, <math>H_7</math>, 2<math>H_7</math>), 2.64 (m, 1H, <math>H_7</math>), 2.56 (s, 3H, <math>CH_3</math>), 2.33 (s, 3H, <math>CH_3</math>).</p>                                                                                                                                 |

|                                                                                                                                                                                      |                                                                                                                                                                                                                                                                                                                                                                                                                                                                                                                                                                                                                                                                                                                                                                                                |
|--------------------------------------------------------------------------------------------------------------------------------------------------------------------------------------|------------------------------------------------------------------------------------------------------------------------------------------------------------------------------------------------------------------------------------------------------------------------------------------------------------------------------------------------------------------------------------------------------------------------------------------------------------------------------------------------------------------------------------------------------------------------------------------------------------------------------------------------------------------------------------------------------------------------------------------------------------------------------------------------|
| 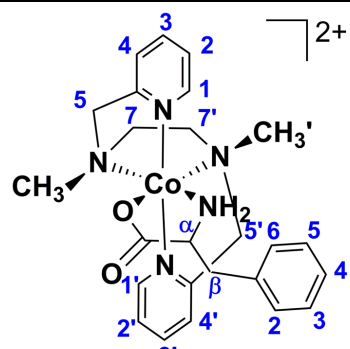 <p>[Co(Phe)(py<sub>2</sub>enMe<sub>2</sub>)]<sup>2+</sup> (<b>3</b>)<br/>Isomer Δ-cisα-exo-exo</p> | <p>8.56 (d, 5.8 Hz, 1H, H<sub>1</sub>), 8.31 (m, H<sub>1'</sub>), 8.20 (dd, 5.8 Hz, 1H, H<sub>3</sub>), 7.83 (m, 1H, H<sub>4</sub>), 7.52 (t, 7.7 Hz, 1H, H<sub>2</sub>), 7.24-7.12 (m, 5H, H<sub>2</sub>-H<sub>6</sub>-Phen), 6.03 (t, 11.0 Hz, 1H, NH<sub>2</sub>), 4.83 (d, 16.3 Hz, 1H, H<sub>5'</sub>), 4.72 (overlap NH<sub>2</sub>), 4.38 (m, 1H, H<sub>5'</sub>), 3.14 (overlap, H<sub>α</sub>), 2.87 (m, H<sub>7</sub> or 7'), 2.82 (m, H<sub>β</sub>), 2.64 (overlap, H<sub>7</sub> or 7'), 2.53 (s, 3H, CH<sub>3</sub>), 2.38 (s, 3H, CH<sub>3</sub>). Some hydrogen atoms could not be identified unequivocally due to overlapping.</p>                                                                                                                                            |
|  <p>[Co(bipy)<sub>2</sub>(Phe)]<sup>2+</sup> (<b>4</b>)</p>                                         | <p>9.28 (d, J = 6.0 Hz, 1H, H<sub>1</sub>), 8.97 (t, 7.9 Hz, 2H, H<sub>4</sub> and H<sub>4'</sub>), 8.84 (d, 7.9 Hz, 2H, H<sub>8</sub> and H<sub>8'</sub>), 8.68 (t, 7.9 Hz, 2H, H<sub>3</sub> and H<sub>3'</sub>), 8.38-8.35 (m, 3H, H<sub>1'</sub>, H<sub>7</sub> and H<sub>7'</sub>), 8.21 (ddd, 7.9, 6.0, 1.3 Hz, 1H, H<sub>2</sub>), 8.09 (ddd, 7.9, 6.0, 1.3 Hz, 1H, H<sub>2'</sub>), 7.65 (m, 2H, H<sub>5'</sub> and H<sub>6'</sub>), 7.59 (ddd, 7.9, 6.0, 1.3 Hz, 1H, H<sub>6</sub>), 7.30-7.25 (m, 5H, H<sub>2</sub>-H<sub>6</sub>-Phen), 7.15 (t, 10.4 Hz, 1H, NH<sub>2</sub>), 6.98 (d, 6.0 Hz, 1H, H<sub>5</sub>), 5.34 (t, 10.4 Hz, 1H, NH<sub>2</sub>), 4.13 (m, 1H, H<sub>α</sub>), 3.12 (dd, 15.5, 3.7 Hz, 1H, H<sub>β</sub>), 2.81 (dd, 15.5, 8.5 Hz, 1H, H<sub>β</sub>).</p> |

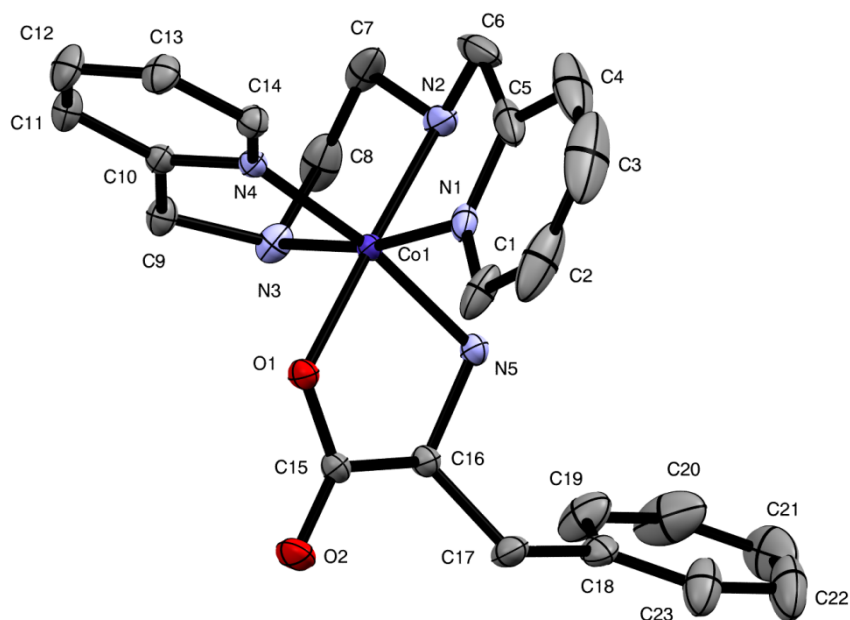

Fig. S1. Representation of  $[\text{Co}(\text{phenylalanine})(\text{py}_2\text{en})]^{2+}$  (**1**).

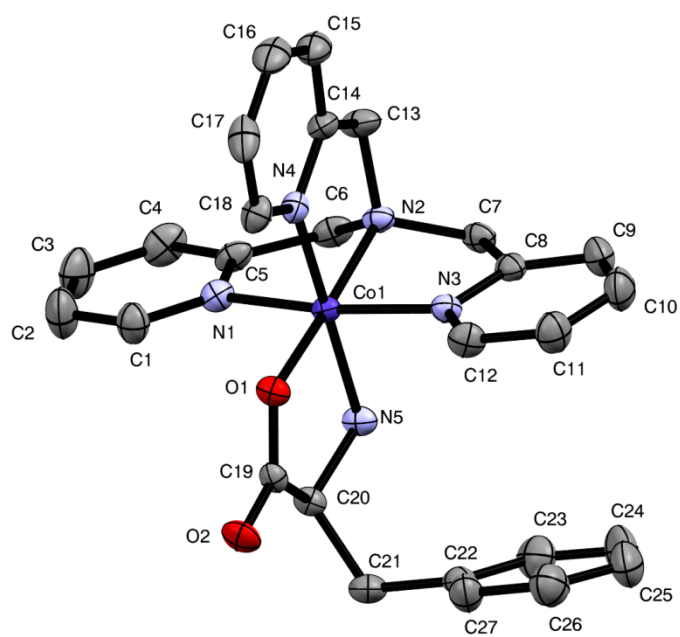

Fig. S2. Representation of  $[\text{Co}(\text{phenylalanine})(\text{tpa})]^{2+}$  (**2**).

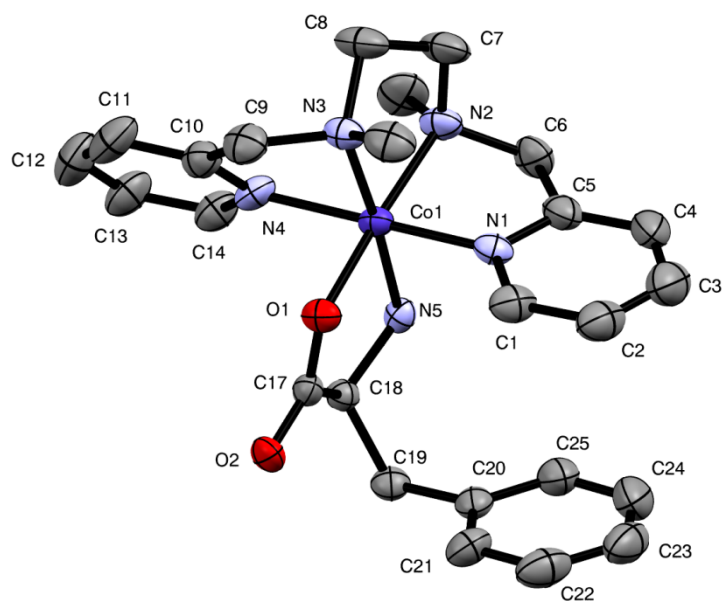

Fig. S3. Representation of  $[\text{Co}(\text{phenylalanine})(\text{py}_2\text{enMe}_2)]^{2+}$  (**3**).

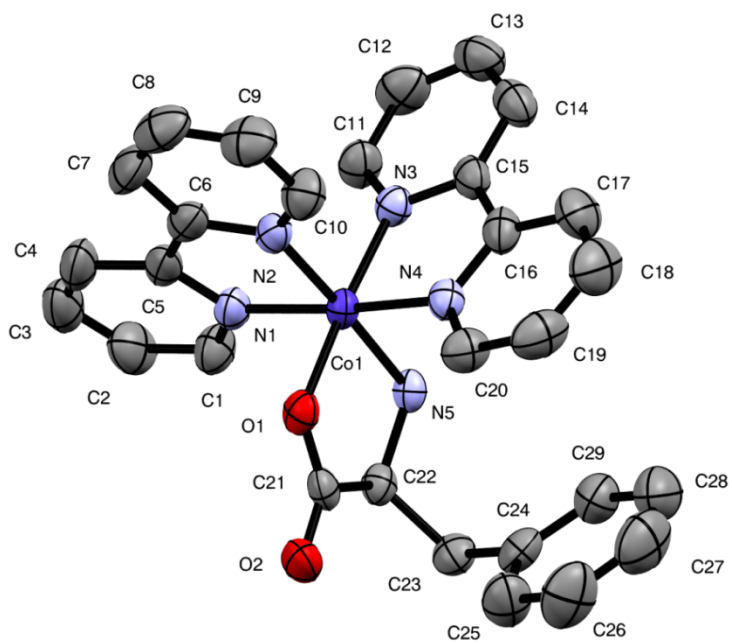

Fig. S4. Representation of  $[\text{Co}(\text{bipy})_2(\text{phenylalanine})]^{2+}$  (**4**).

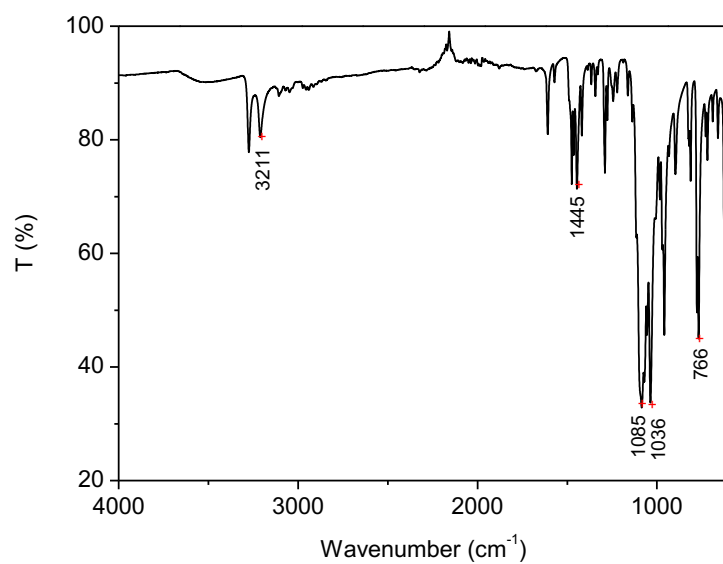

Fig. S5. Infrared spectrum (ZnSe/diamond ATR) of complex  $[\text{CoCl}_2(\text{py}_2\text{en})]\text{ClO}_4$ .

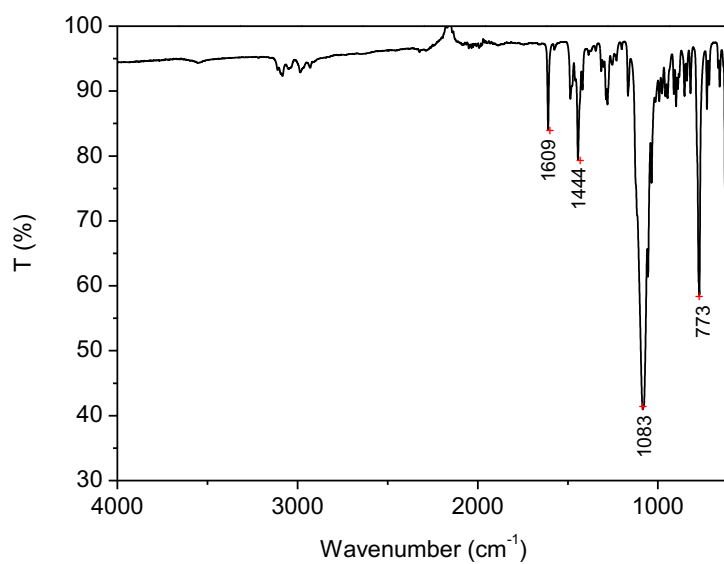

Fig. S6. Infrared spectrum (ZnSe/diamond ATR) of complex  $[\text{CoCl}_2(\text{tpa})]\text{ClO}_4$ .

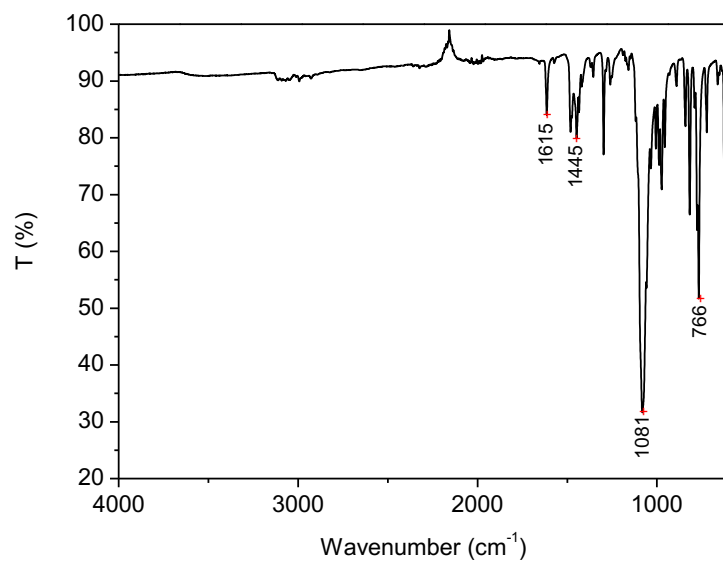

Fig. S7. Infrared spectrum (ZnSe/diamond ATR) of complex  $[\text{CoCl}_2(\text{py}_2\text{enMe}_2)]\text{ClO}_4$ .

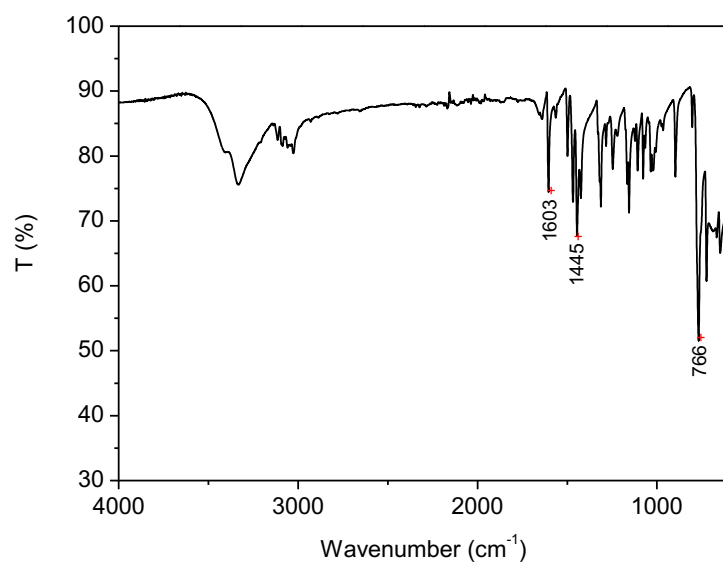

Fig. S8. Infrared spectrum (ZnSe/diamond ATR) of complex  $[\text{Co}(\text{bipy})_2\text{Cl}_2]\text{Cl}$ .



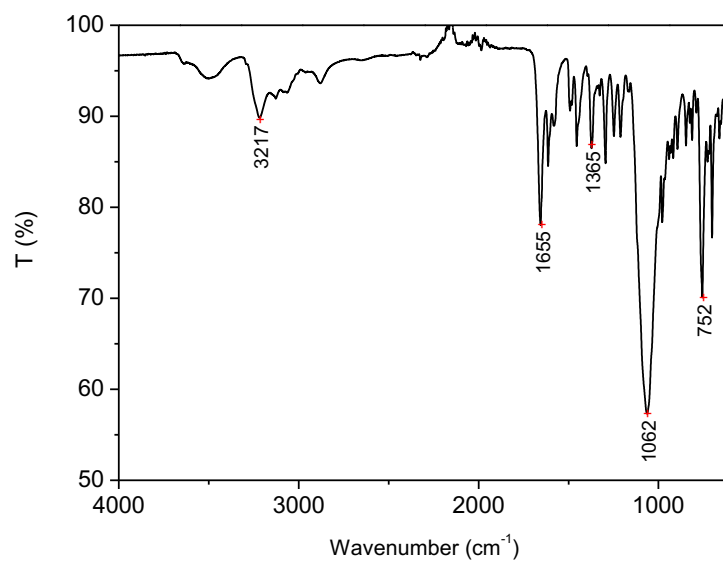

Fig. S9. Infrared spectrum (ZnSe/diamond ATR) of complex 1.

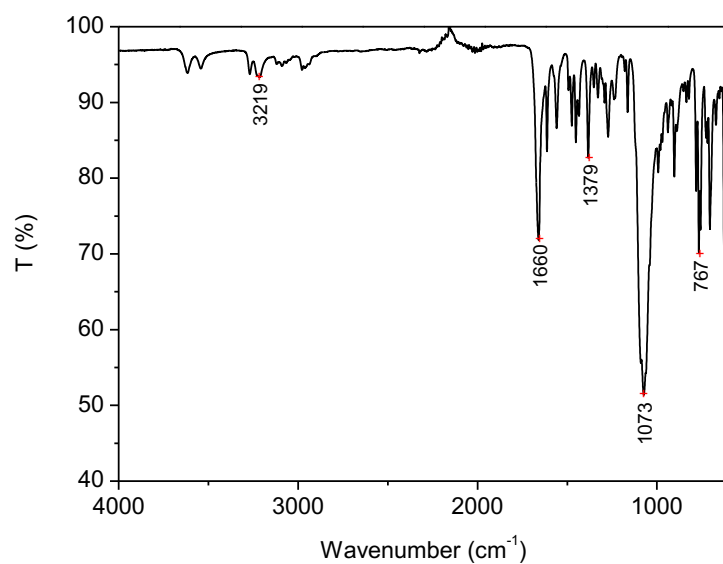

Fig. S10. Infrared spectrum (ZnSe/diamond ATR) of complex 2.

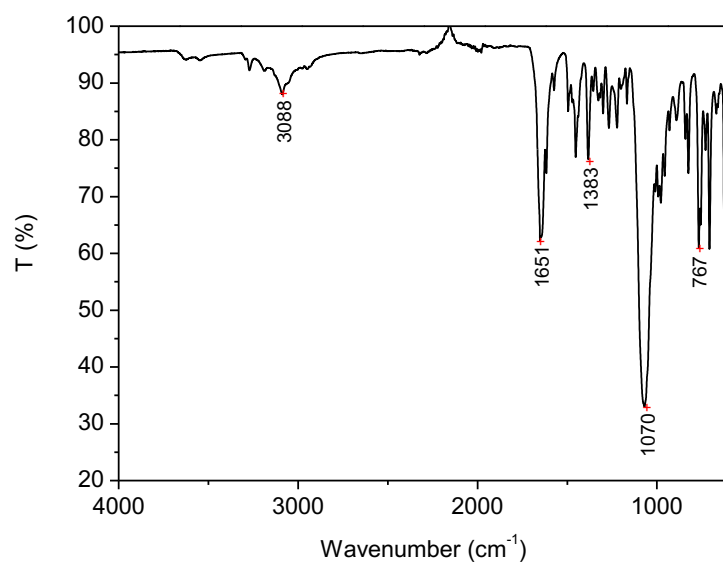

Fig. S11. Infrared spectrum (ZnSe/diamond ATR) of complex **3**.

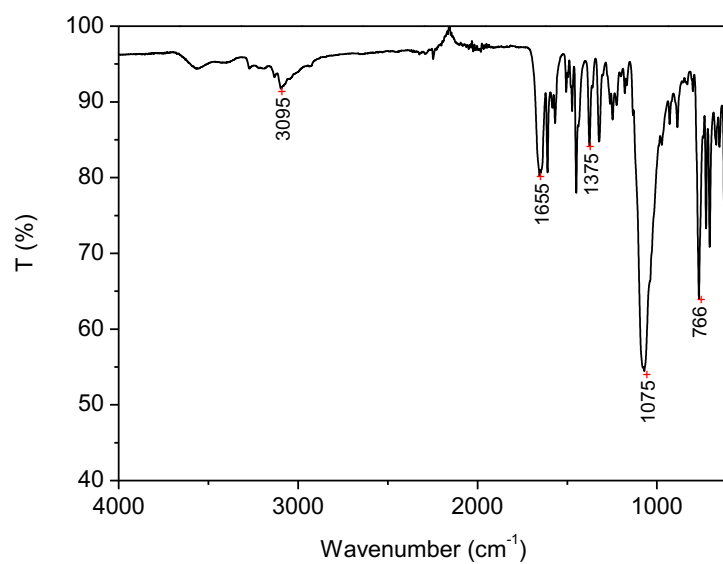

Fig. S12. Infrared spectrum (ZnSe/diamond ATR) of complex **4**.

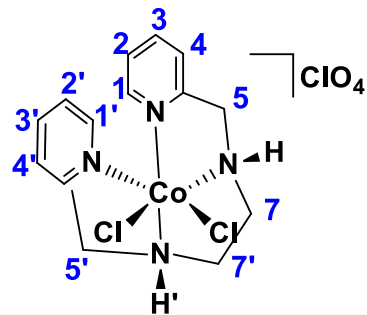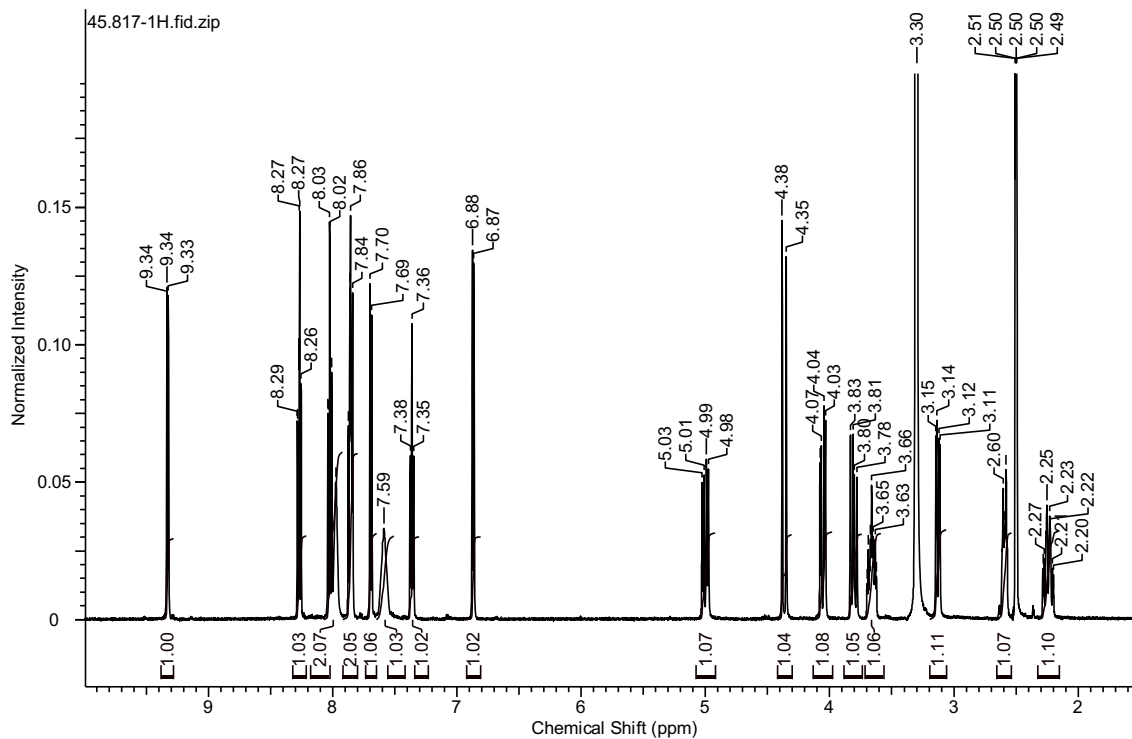

Fig. S13.  $^1\text{H}$  NMR spectrum of complex  $[\text{CoCl}_2(\text{py}_2\text{en})]\text{ClO}_4$  in  $\text{DMSO-d}_6$ .

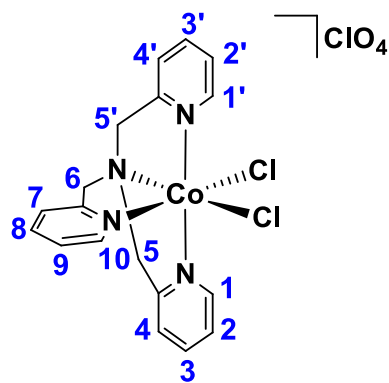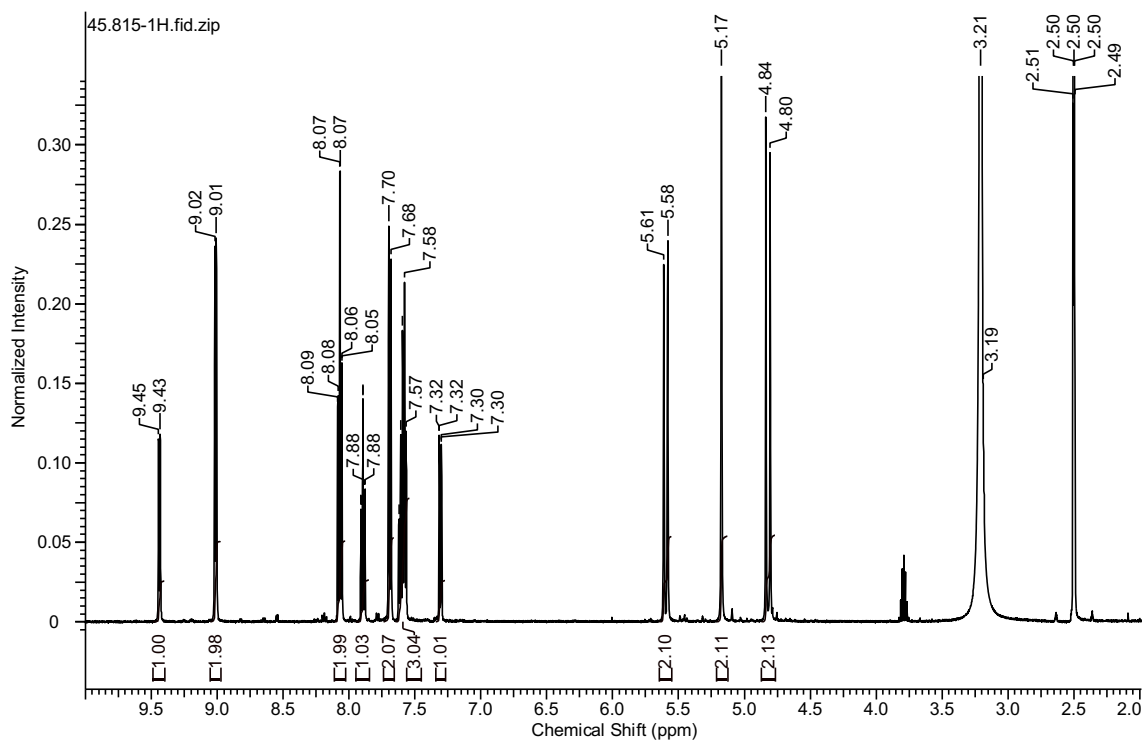

Fig. S14.  $^1\text{H}$  NMR spectrum of complex  $[\text{CoCl}_2(\text{tpa})]\text{ClO}_4$  in  $\text{DMSO-d}_6$ .

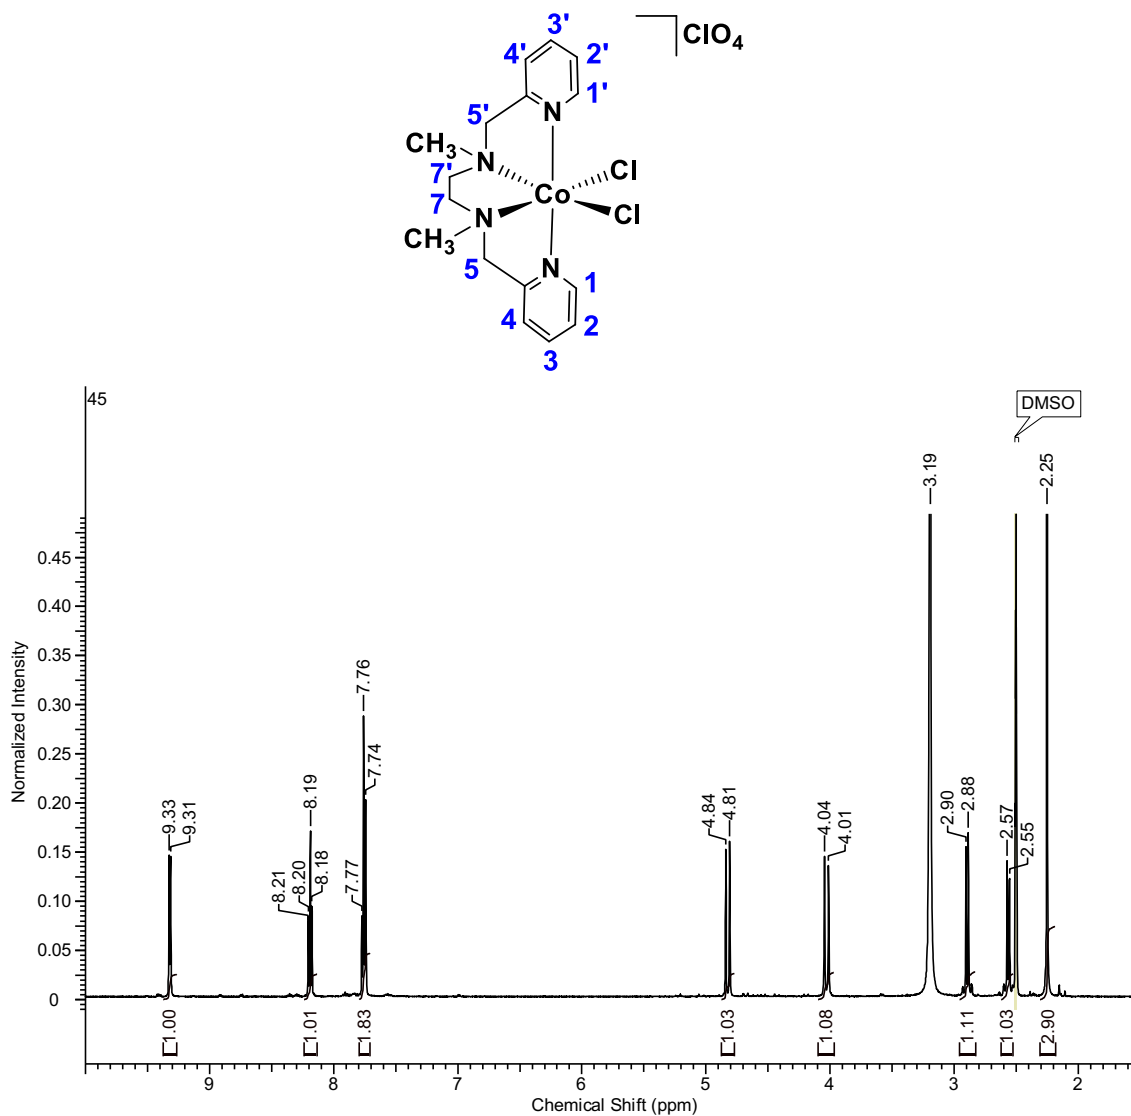

Fig. S15.  $^1\text{H}$  NMR spectrum of complex  $[\text{CoCl}_2(\text{py}_2\text{enMe}_2)]\text{ClO}_4$  in  $\text{DMSO-d}_6$ .

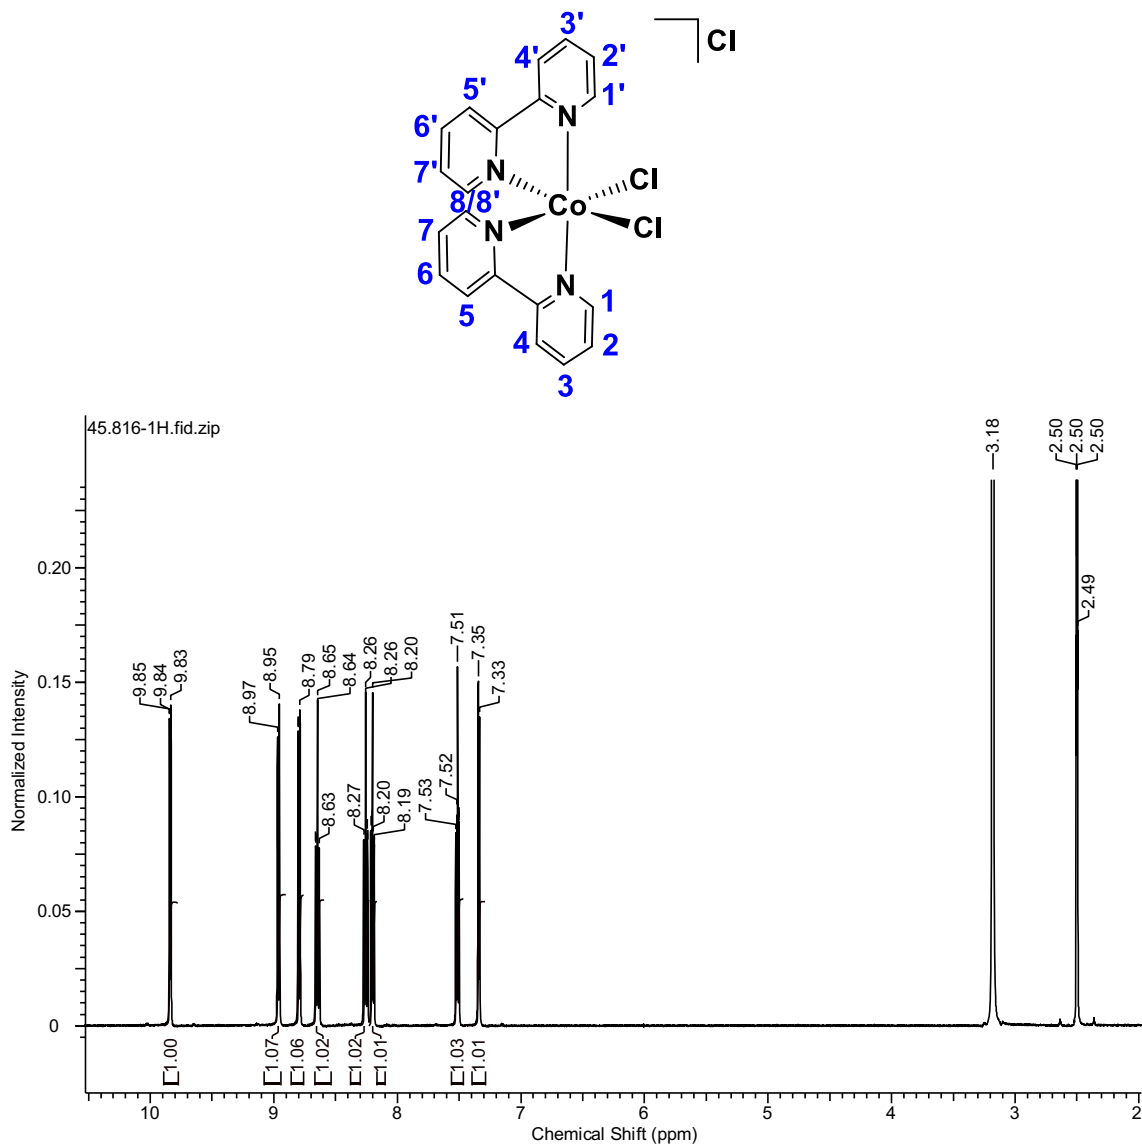

Fig. S16.  $^1\text{H}$  NMR spectrum of complex  $[\text{Co}(\text{bipy})_2\text{Cl}_2]\text{Cl}$  in  $\text{DMSO-d}_6$ .

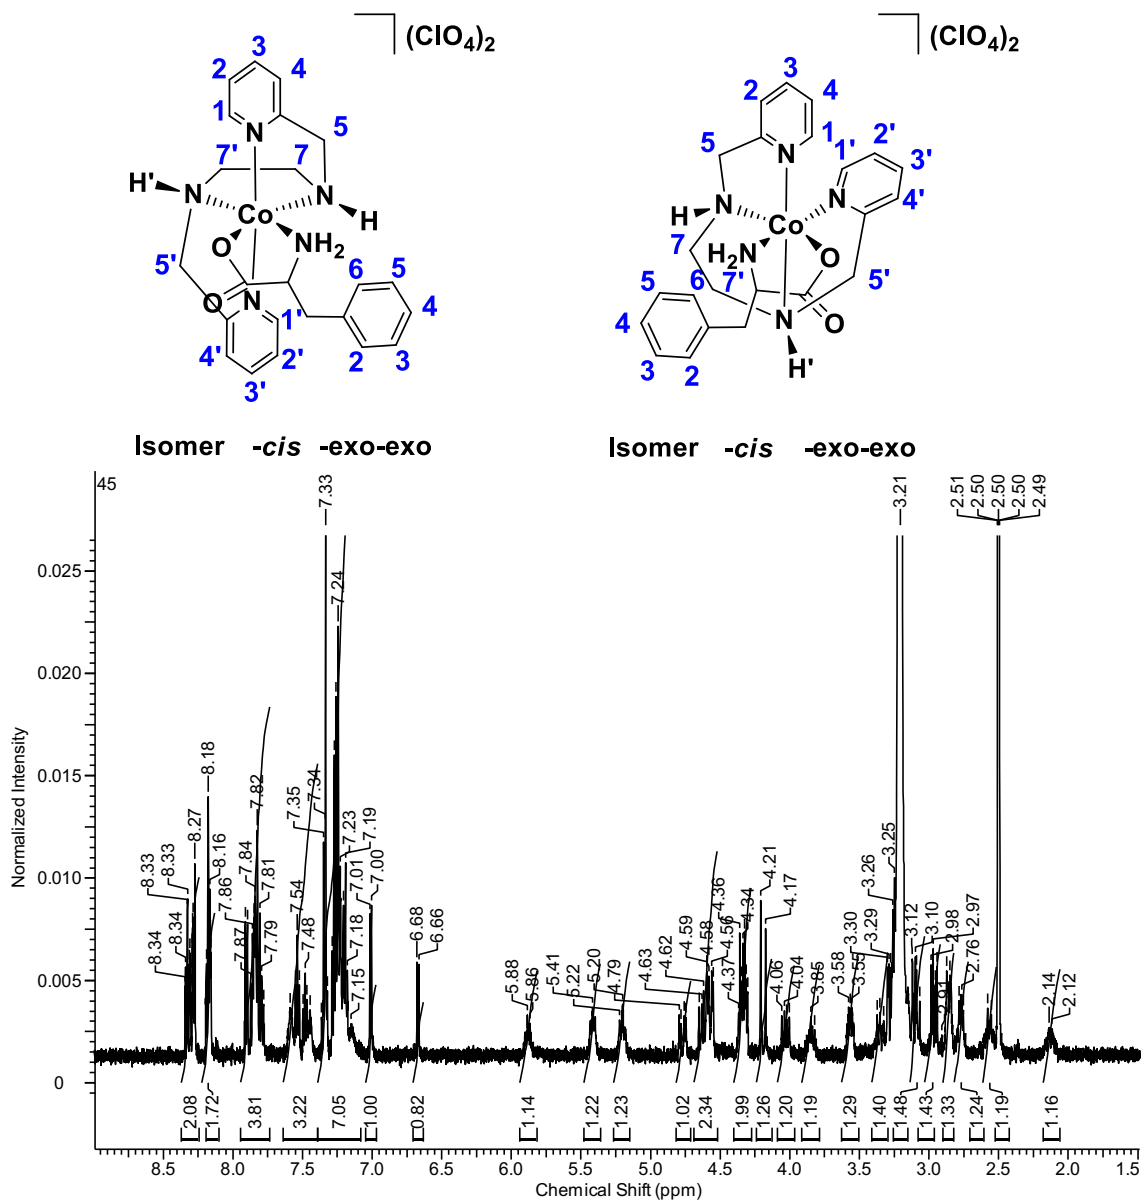

Fig. S17.  $^1\text{H}$  NMR spectrum of complex **1** in DMSO- $d_6$ . Ratio  $\Delta$ -cis $\alpha$ -exo-exo:  $\Delta$ -cis $\beta$ 1-exo-exo 3:2.

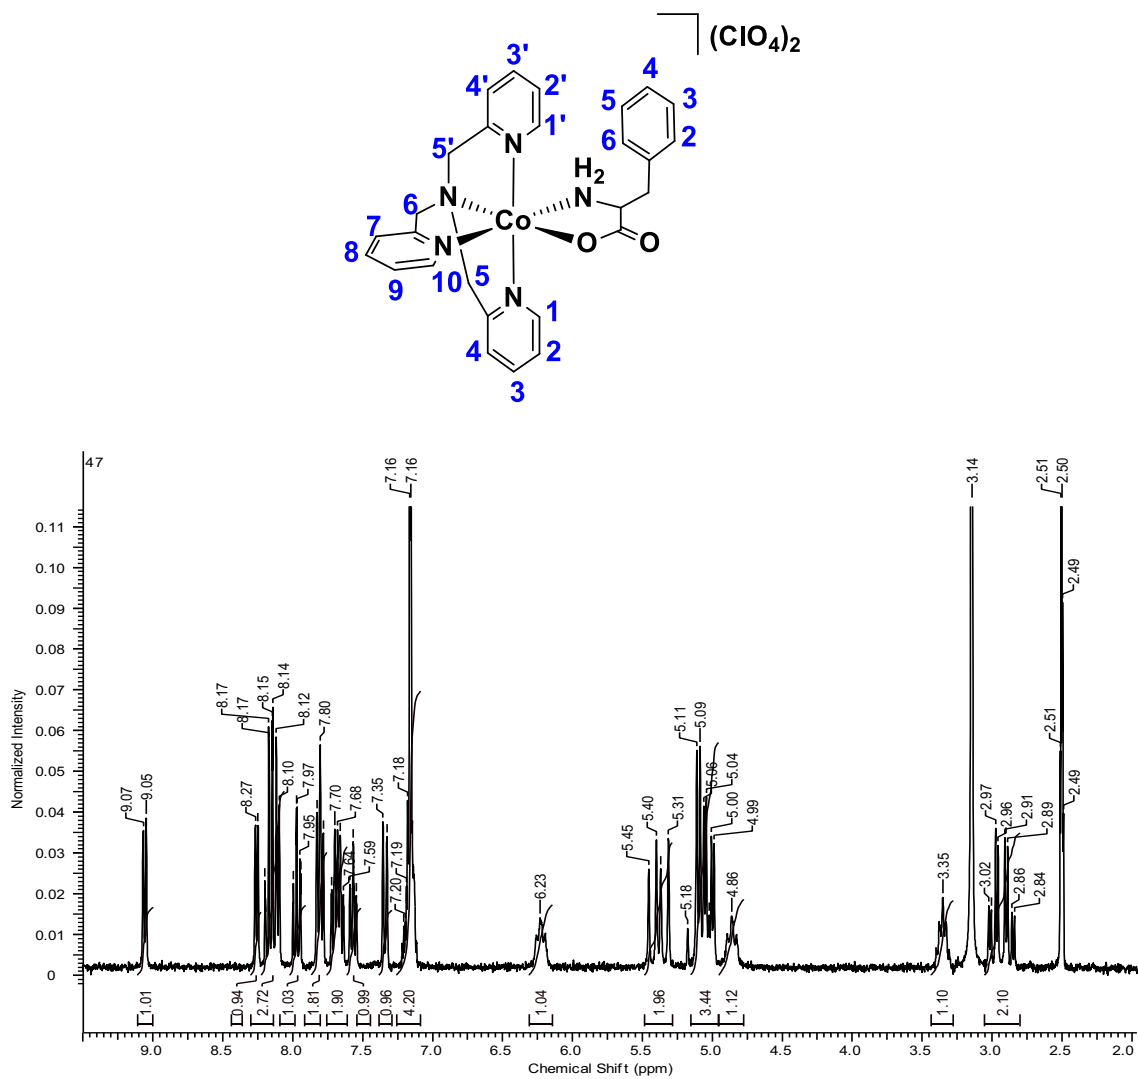

Fig. S18.  $^1\text{H}$  NMR spectrum of complex **2** in  $\text{DMSO-d}_6$ .



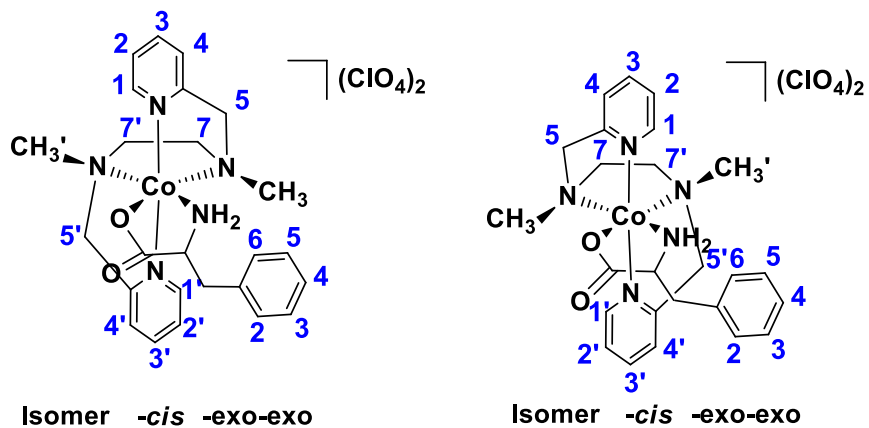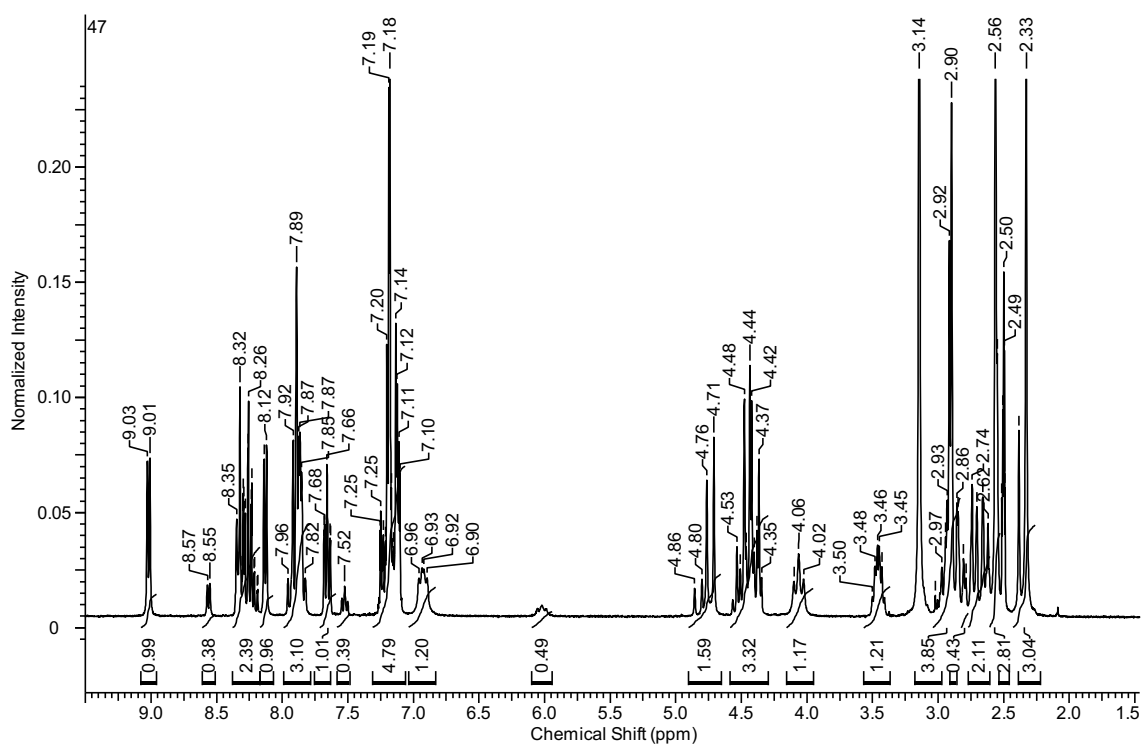

Fig. S19.  $^1\text{H}$  NMR spectrum of complex **3** in DMSO- $d_6$ . Ratio  $\Delta$ -cis $\alpha$ -exo-exo:  $\Delta$ -cis $\alpha$ -exo-exo 5:2.

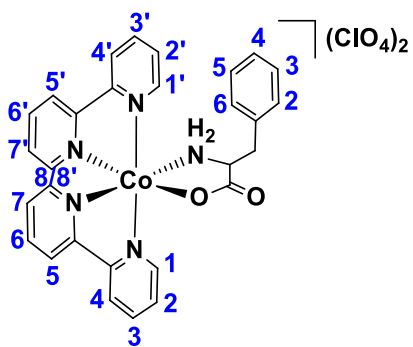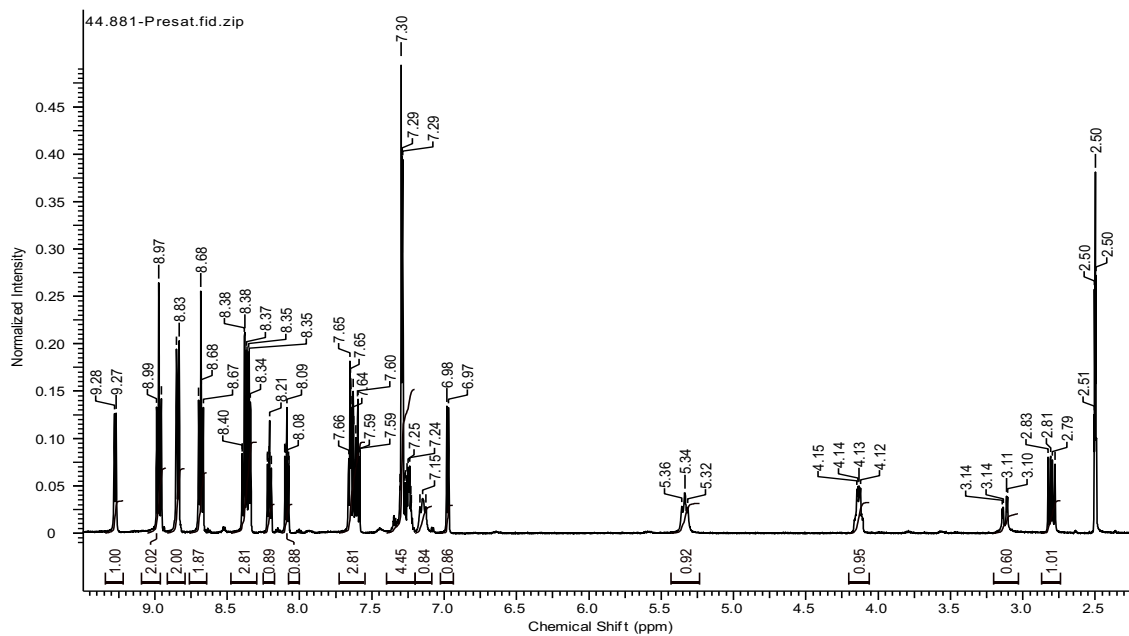

Fig. S20.  $^1\text{H}$  NMR spectrum of complex **4** in  $\text{DMSO-d}_6$ .

As prepared

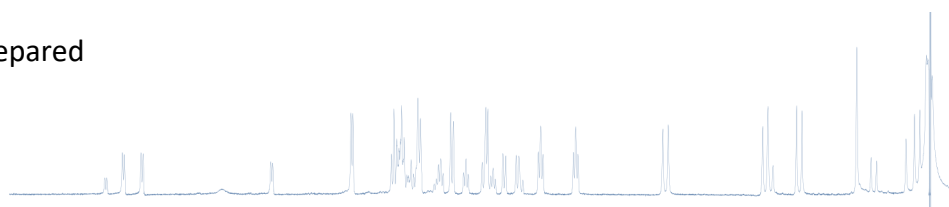

Reported by Kotani *et al*

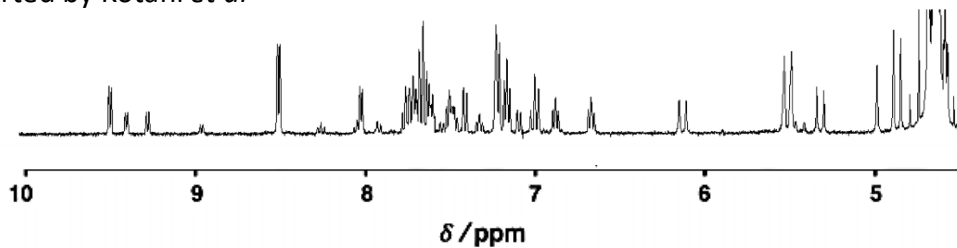

Fig. S21.  $^1\text{H}$  NMR spectrum of complex  $[\text{Co}^{\text{III}}_2(\mu\text{-OH})(\mu\text{-O}_2)(\text{TPA})_2](\text{ClO}_4)_3$  obtained in this work (top) and the one reported by Kotani *et al* (bottom).

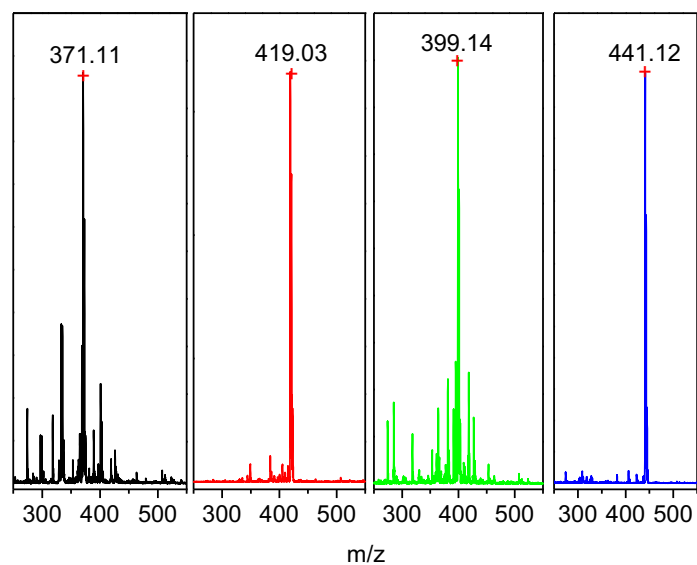

Fig. S22. ESI-MS spectrum (in MeOH) of [CoCl<sub>2</sub>(py<sub>2</sub>en)]ClO<sub>4</sub> (**black**), [CoCl<sub>2</sub>(tpa)]ClO<sub>4</sub> (**red**), [CoCl<sub>2</sub>(py<sub>2</sub>enMe<sub>2</sub>)]ClO<sub>4</sub> (**green**) and [Co(bipy)<sub>2</sub>Cl<sub>2</sub>]Cl (**blue**).

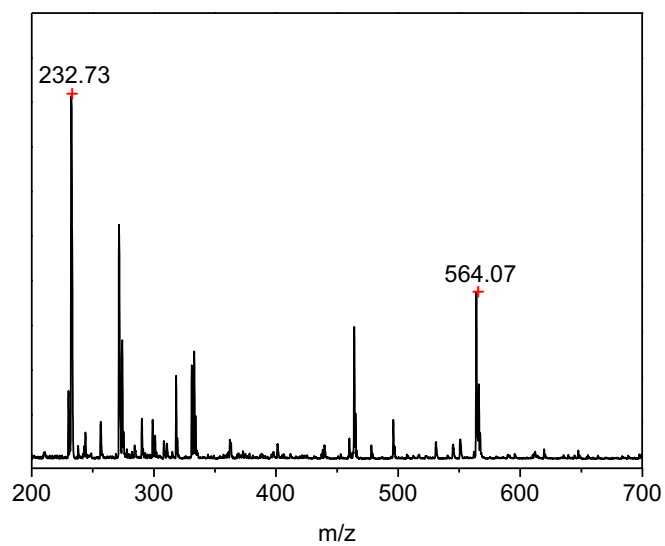

Fig. S23. ESI-MS spectrum of complex **1** in MeCN.

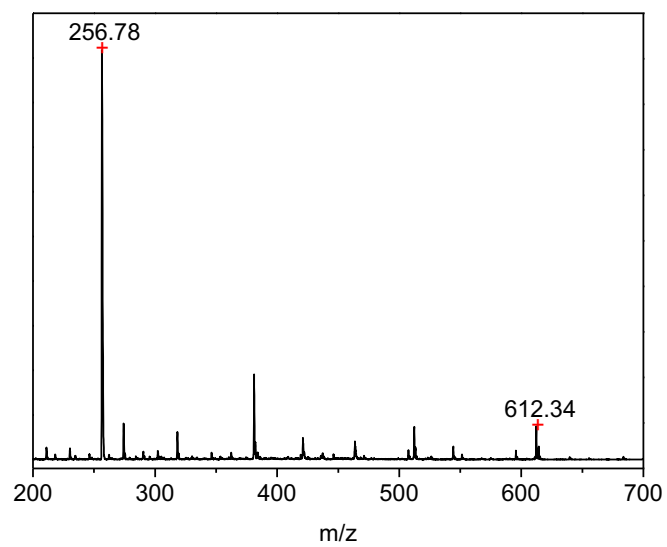

Fig. S24. ESI-MS spectrum of complex **2** in MeCN.

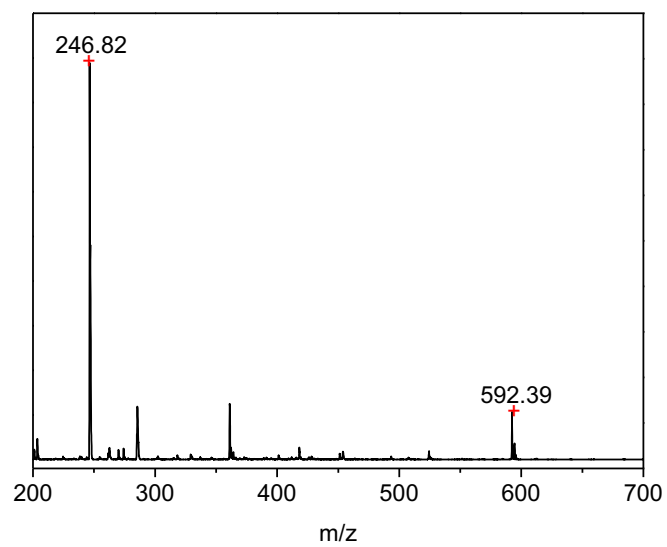

Fig. S25 ESI-MS spectrum of complex **3** in MeCN.

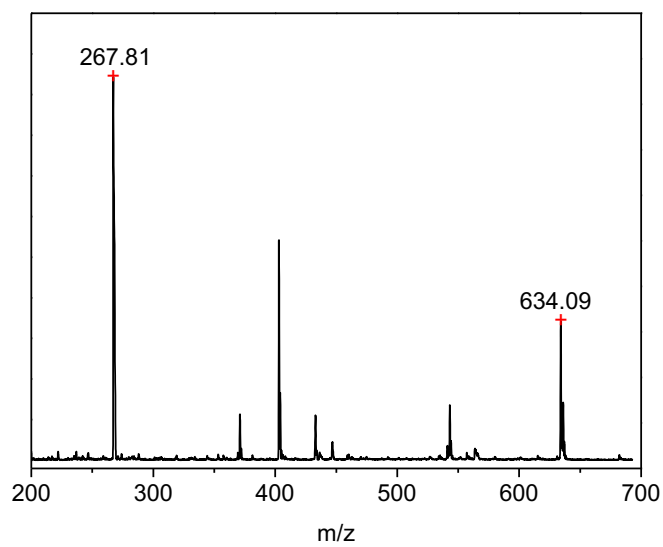

Fig. S26. ESI-MS spectrum of complex **4** in MeCN.

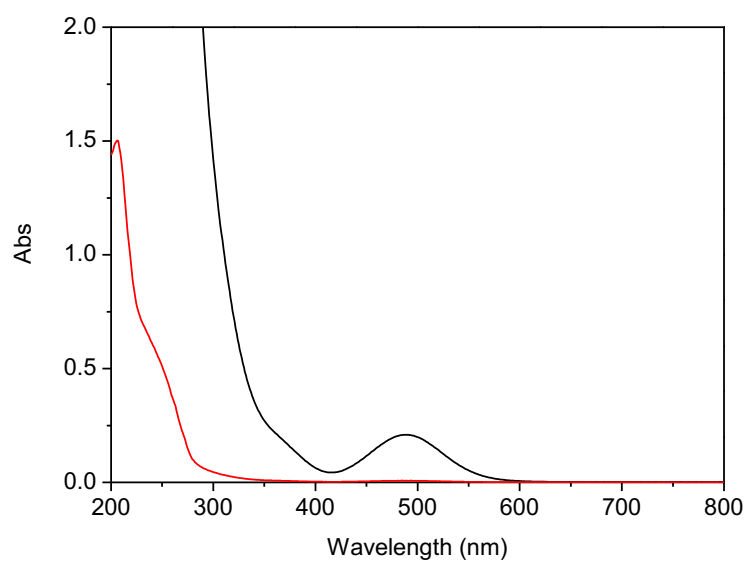

Fig. S27. UV-visible spectra of **1** in MeCN at  $1.0 \times 10^{-3} \text{ mol L}^{-1}$  and  $3.0 \times 10^{-5} \text{ mol L}^{-1}$ .

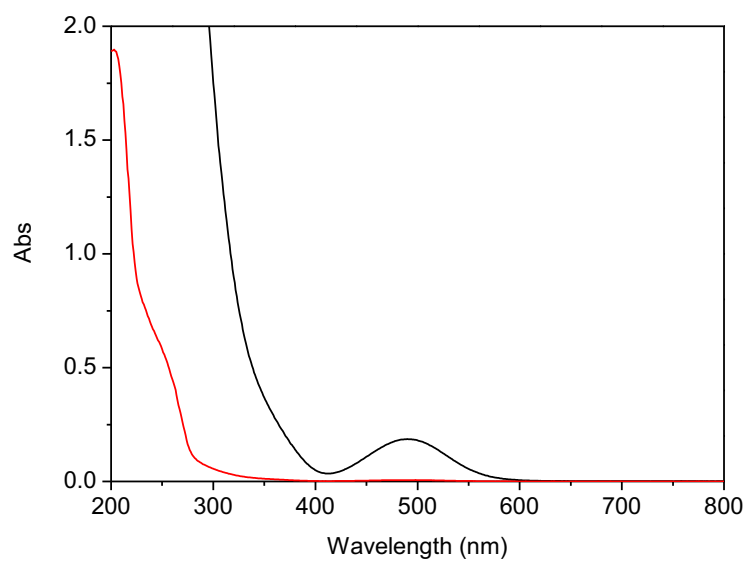

Fig. S28. UV-visible spectra of **2** in MeCN at  $1.0 \times 10^{-3} \text{ mol L}^{-1}$  and  $3.0 \times 10^{-5} \text{ mol L}^{-1}$ .

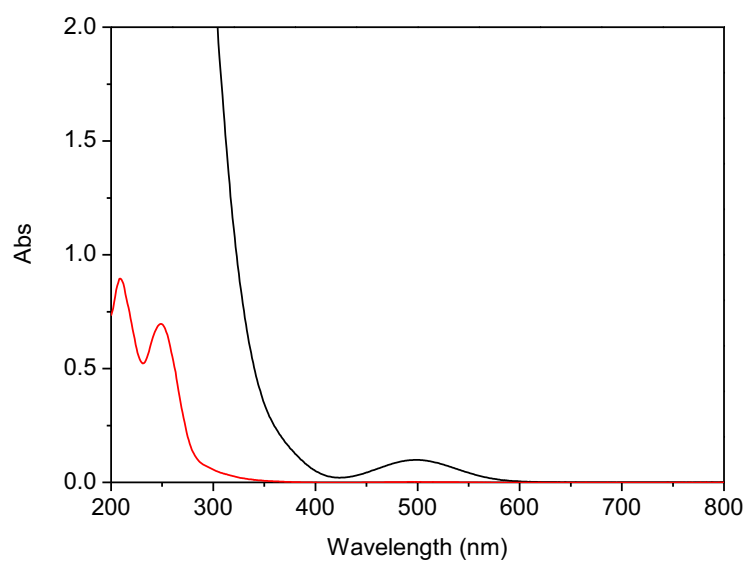

Fig.S29. UV-visible spectra of **3** in MeCN at  $1.0 \times 10^{-3} \text{ mol L}^{-1}$  and  $3.0 \times 10^{-5} \text{ mol L}^{-1}$ .

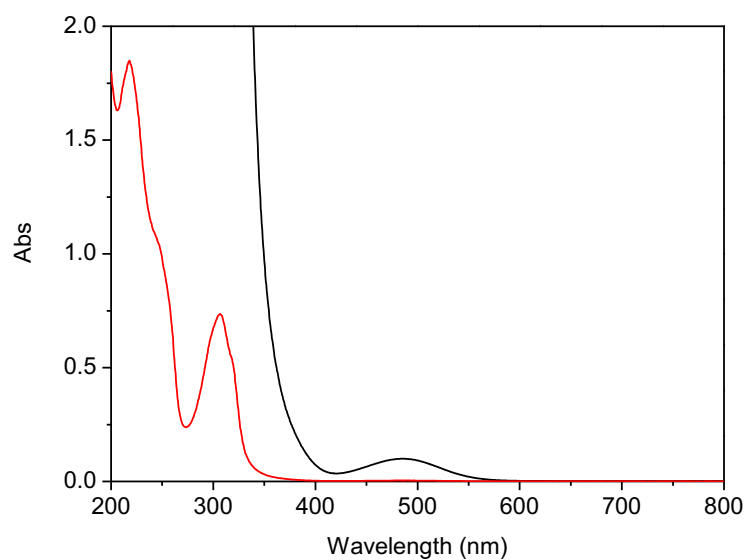

Fig. S30. UV-visible spectra of **4** in MeCN at  $1.0 \times 10^{-3} \text{ mol L}^{-1}$  and  $3.0 \times 10^{-5} \text{ mol L}^{-1}$ .

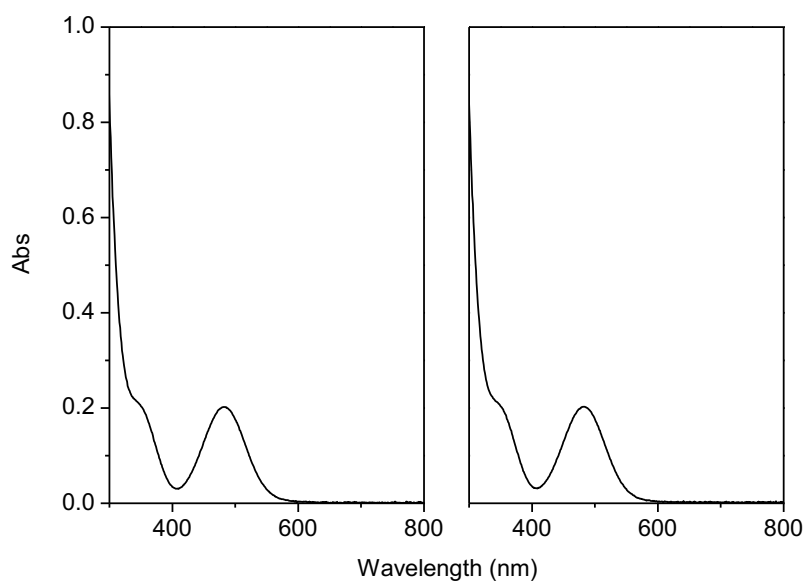

Fig. S31. UV-visible spectra of **1** in pH 5.5 MES/DMSO (5%) (left) and pH 7.4 HEPES/DMSO (5%) (right) at  $1.0 \times 10^{-3} \text{ mol L}^{-1}$ .

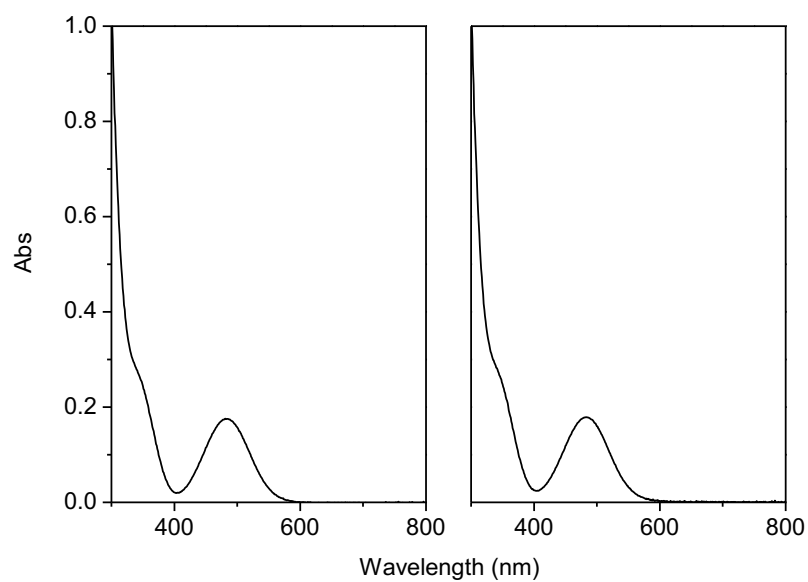

Fig. S32. UV-visible spectra of **2** in pH 5.5 MES/DMSO (5%) (left) and pH 7.4 HEPES/DMSO (5%) (right) at  $1.0 \times 10^{-3} \text{ mol L}^{-1}$ .

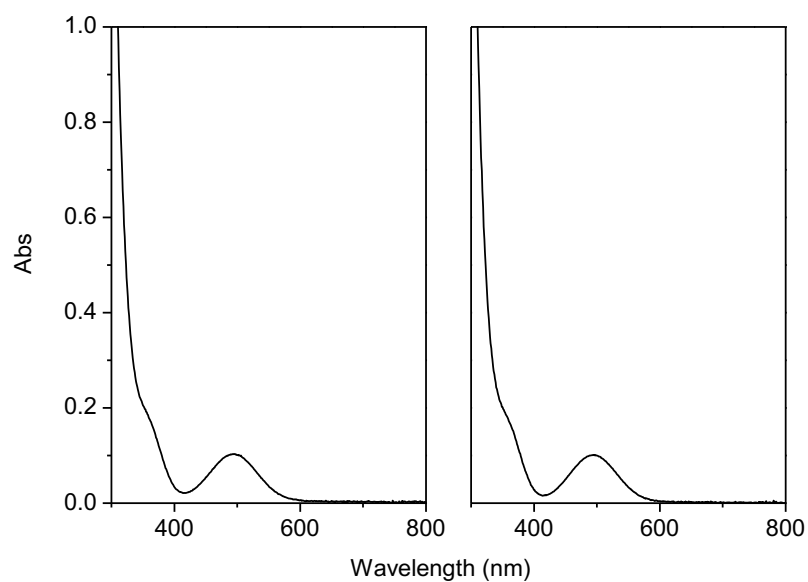

Fig. S33. UV-visible spectra of **3** in pH 5.5 MES/DMSO (5%) (left) and pH 7.4 HEPES/DMSO (5%) (right) at  $1.0 \times 10^{-3} \text{ mol L}^{-1}$ .



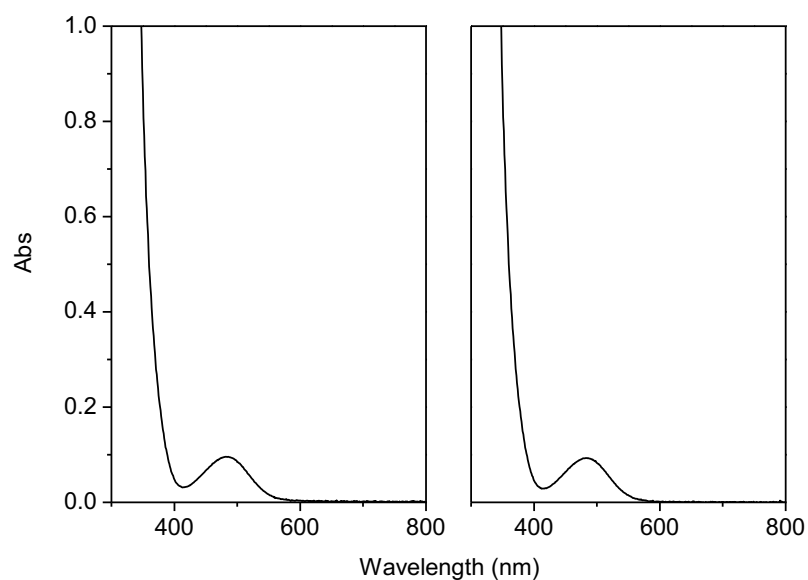

Fig. S34. UV-visible spectra of **4** in pH 5.5 MES/DMSO (5%) (left) and pH 7.4 HEPES/DMSO (5%) (right) at  $1.0 \times 10^{-3} \text{ mol L}^{-1}$ .

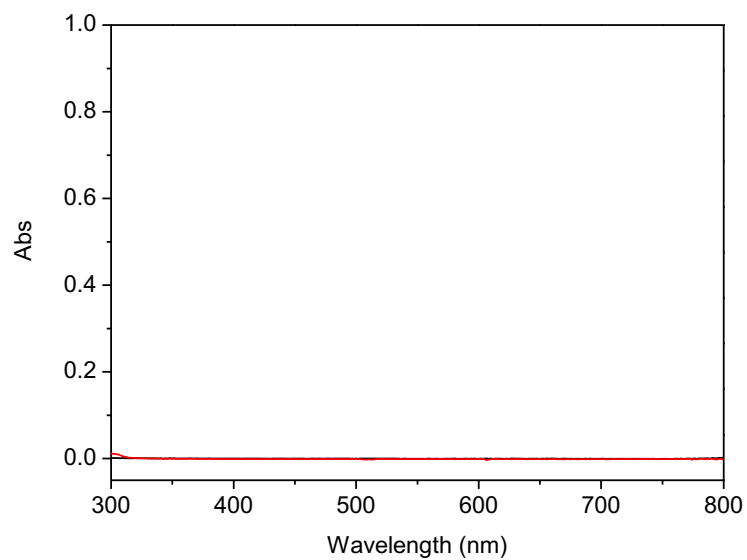

Fig. S35. UV-visible spectra of L-phenylalanine in pH 5.5 MES/DMSO (5%) (**black**) and pH 7.4 HEPES/DMSO (5%) (**red**) at  $1.0 \times 10^{-3} \text{ mol L}^{-1}$ .

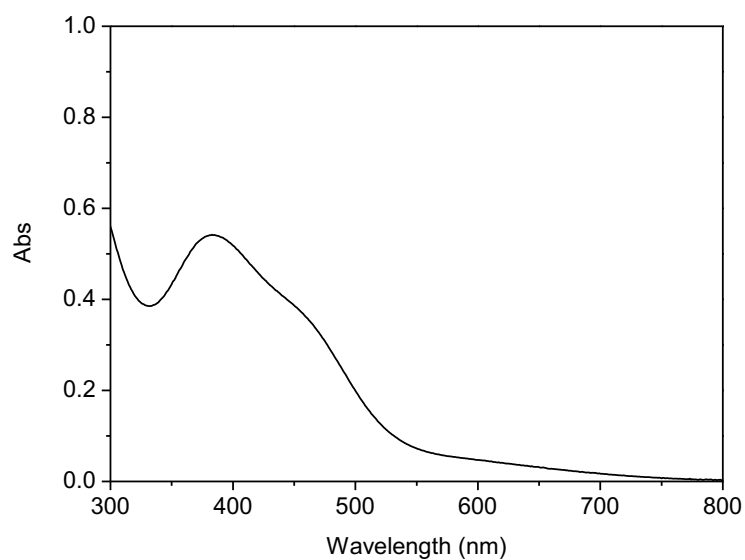

Fig. S36. UV-visible spectra of the complex in  $[\text{Co}^{\text{III}}_2(\mu\text{-OH})(\mu\text{-O}_2)(\text{TPA})_2](\text{ClO}_4)_3$  in pH 7.4 HEPES/DMSO (5%) at  $1.0 \times 10^{-4} \text{ mol L}^{-1}$ .

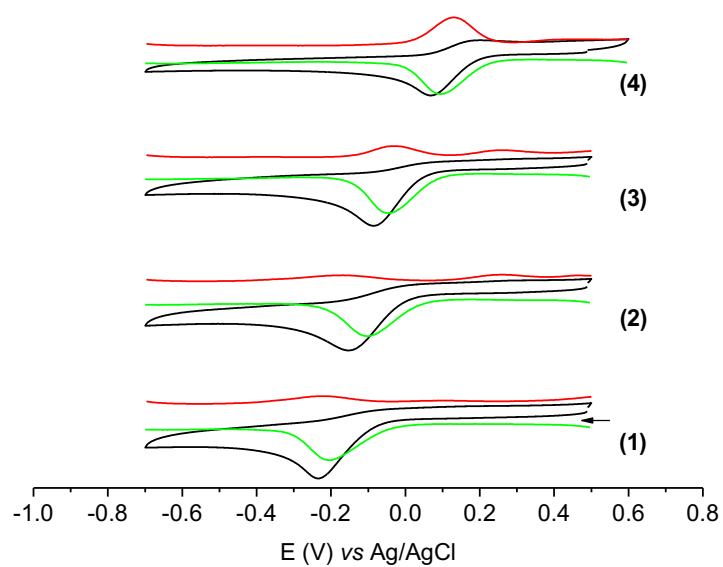

Fig. S37. Cyclic and square wave voltammograms of complexes **1-4** ( $1 \times 10^{-4} \text{ mol L}^{-1}$ ) in MES buffer (pH 5.5), using a three electrode arrange (working: carbon; ref.: Ag/AgCl(NaCl 3 mol  $\text{L}^{-1}$ ); aux.: Pt wire). CV:  $0.1 \text{ V s}^{-1}$ ; SWV: pulse = 25 mV, step size = 4 mV and freq. = 15 Hz.

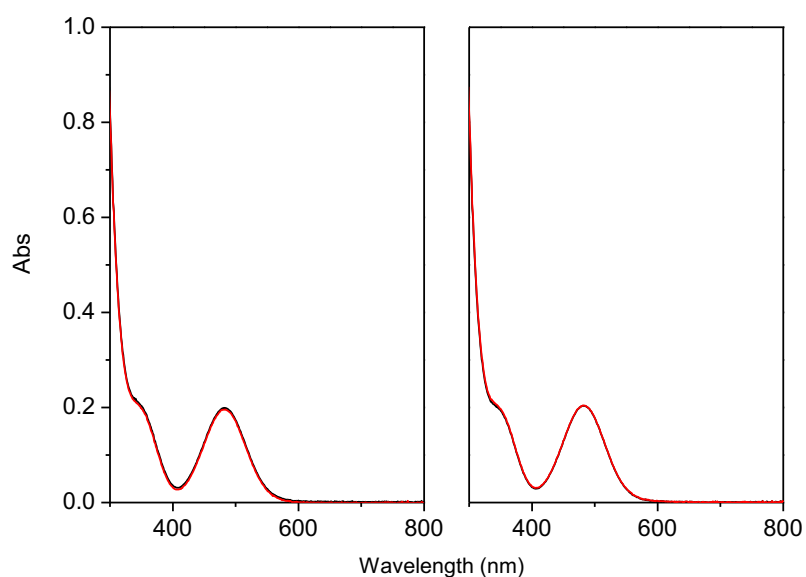

Fig. S38. UV-Visible spectra of complex **1** ( $1.0 \times 10^{-3} \text{ mol L}^{-1}$ ) in pH 5.5 MES buffer/DMSO (5%) (left) and pH 7.4 HEPES/DMSO (5%) (right), from freshly prepared solution and after 24 h at 25°C.

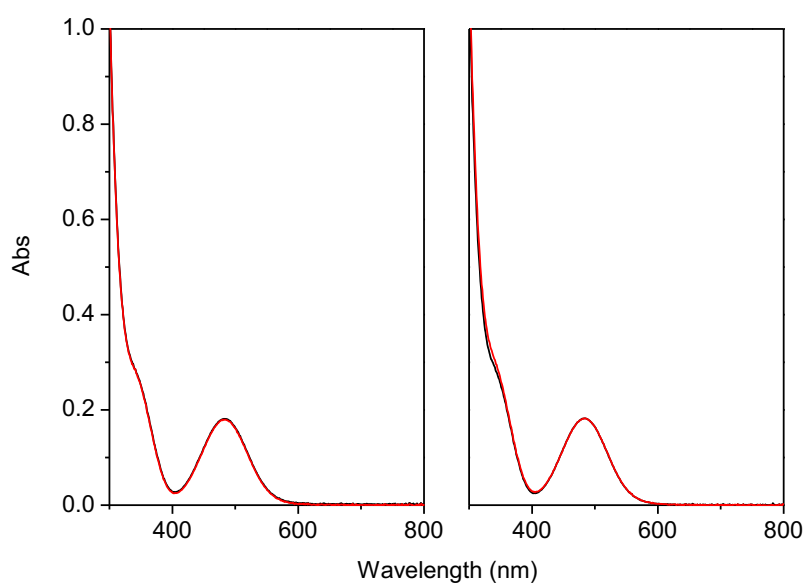

Fig. S39. UV-Visible spectra of complex **2** ( $1.0 \times 10^{-3} \text{ mol L}^{-1}$ ) in pH 5.5 MES/DMSO (5%) (left) and pH 7.4 HEPES/DMSO (5%) (right), from freshly prepared solution and after 24 h at 25°C.

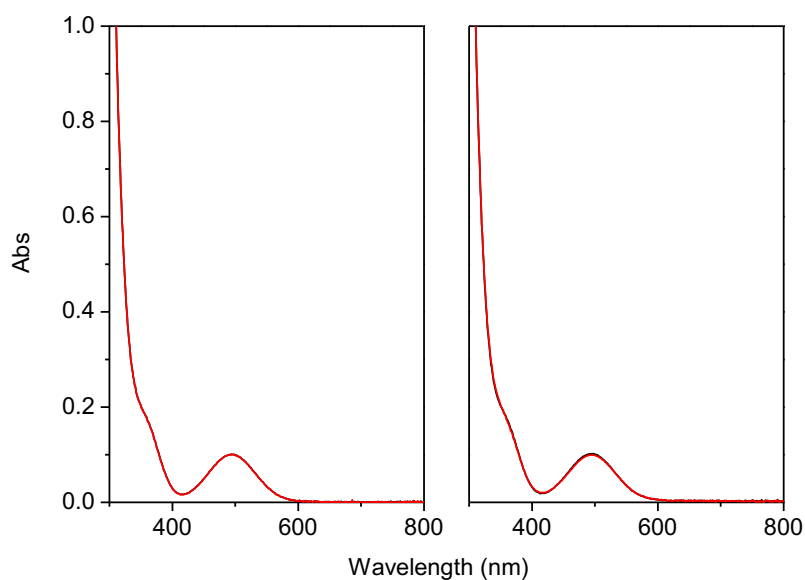

Fig. S40. UV-Visible spectra of complex **3** ( $1.0 \times 10^{-3} \text{ mol L}^{-1}$ ) in MES buffer/DMSO (5%) pH 5.5 (left) and HEPES buffer/DMSO (5%) pH 7.4 (right), from freshly prepared solution and after 24 h at 25°C.

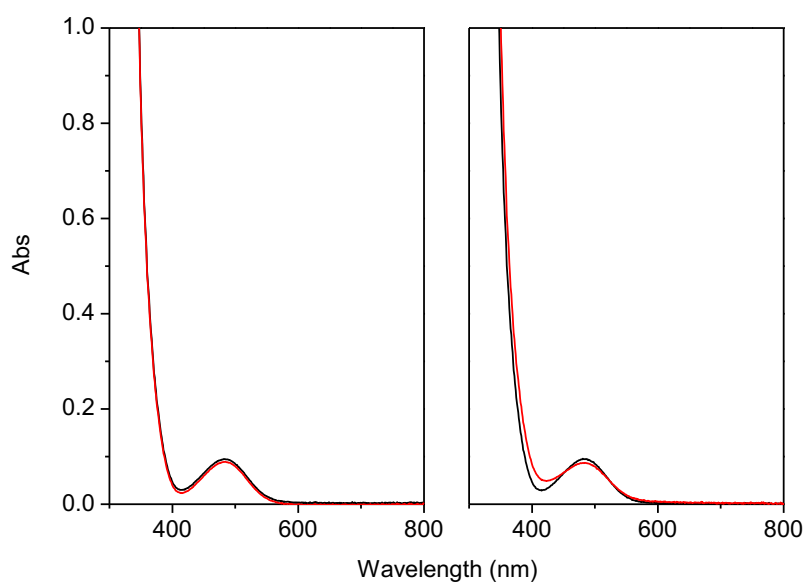

Fig. S41. UV-Visible spectra of complex **4** ( $1.0 \times 10^{-3} \text{ mol L}^{-1}$ ) in pH 5.5 MES/DMSO (5%) (left) and pH 7.4 HEPES/DMSO (5%) (right), from freshly prepared solution and after 24 h at 25°C.

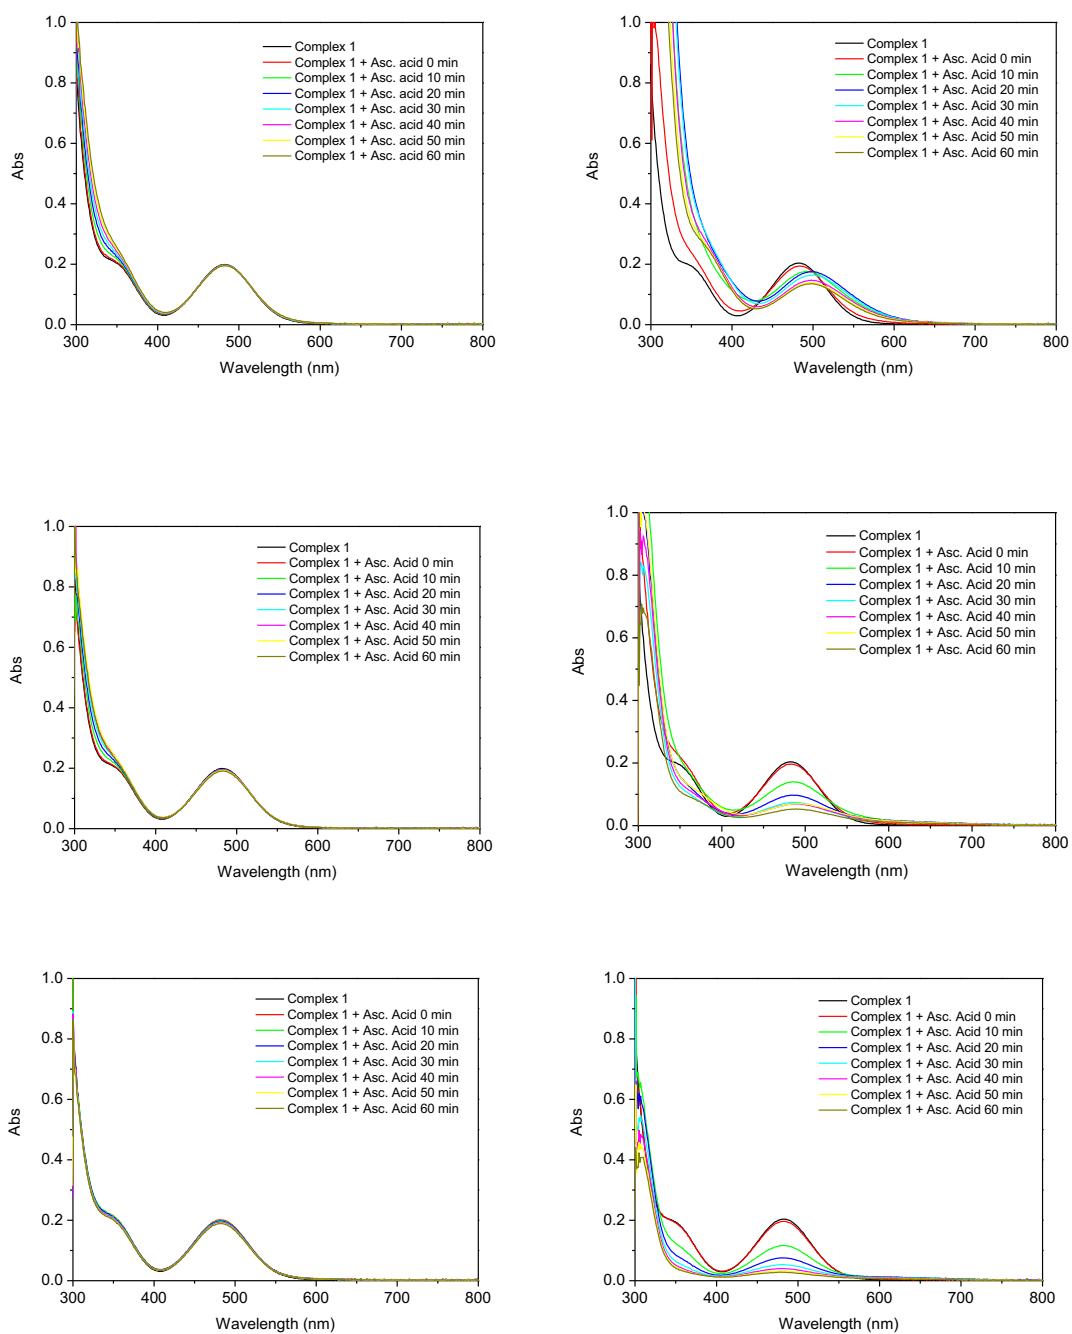

Fig. S42. UV-Visible spectra of complex **1** ( $1.0 \times 10^{-3}$  mol L<sup>-1</sup>) in pH 5.5 MES/DMSO (5%) (left) and pH 7.4 HEPES/DMSO (5%) (right), before and after reaction with ascorbic acid (5:1), saturated with O<sub>2</sub> (top), air (middle) and argon (bottom), at 25°C during 1 hour.

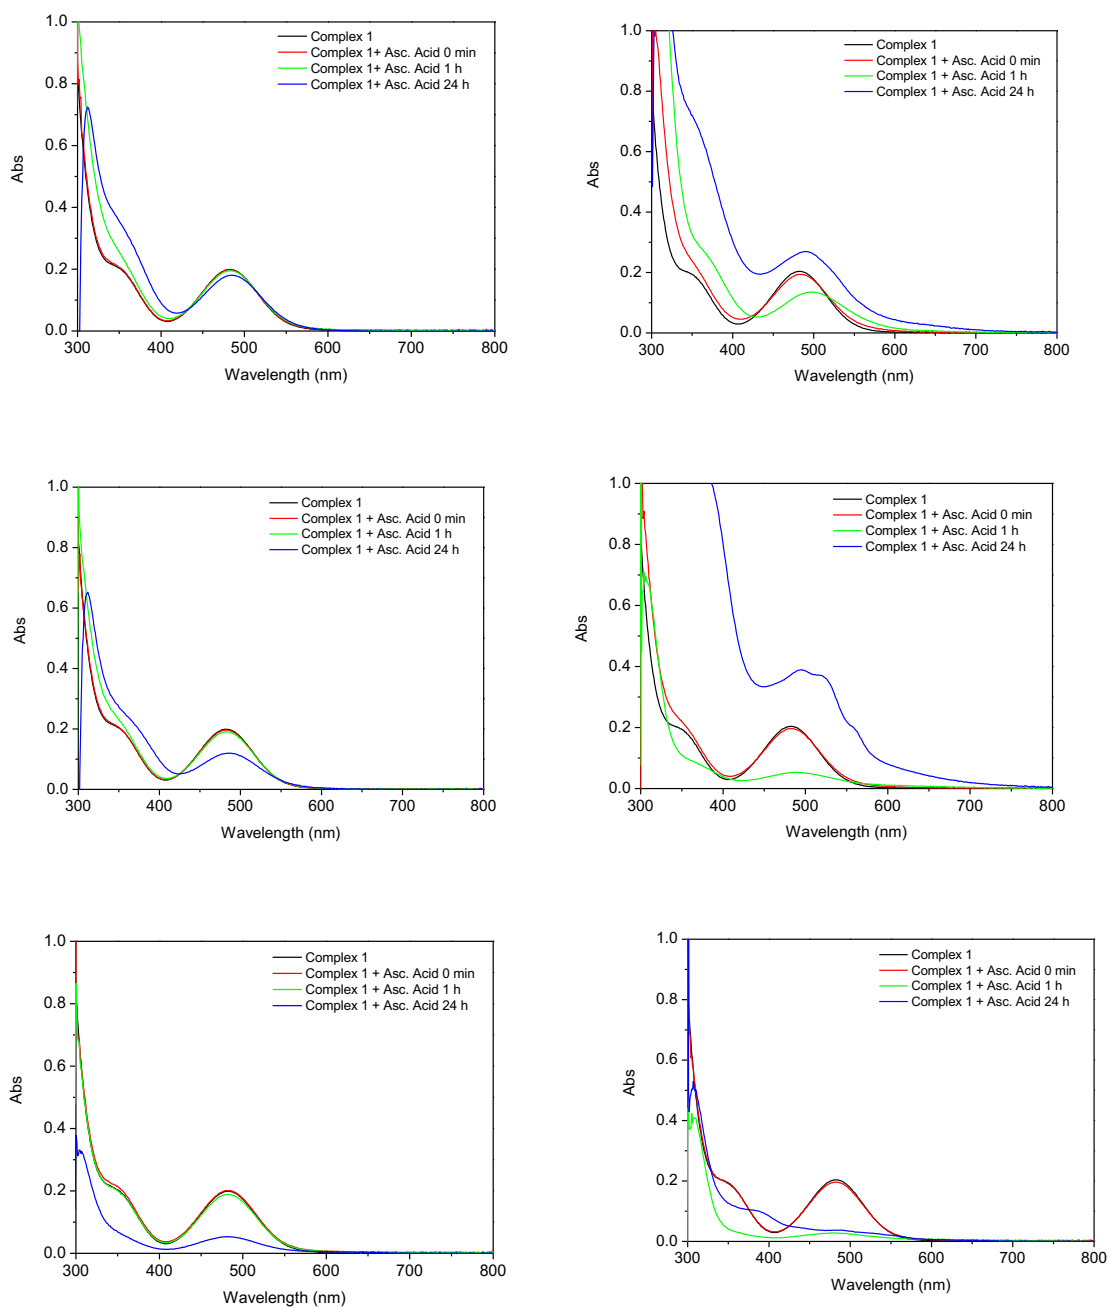

Fig. S43. UV-Visible spectra of complex **1** ( $1.0 \times 10^{-3}$  mol L<sup>-1</sup>) in pH 5.5 MES/DMSO (5%) (left) and pH 7.4 HEPES/DMSO (5%) (right), before and after reaction with ascorbic acid (5:1), saturated with O<sub>2</sub> (top), air (middle) and argon (bottom), at 25°C during 24 hours.

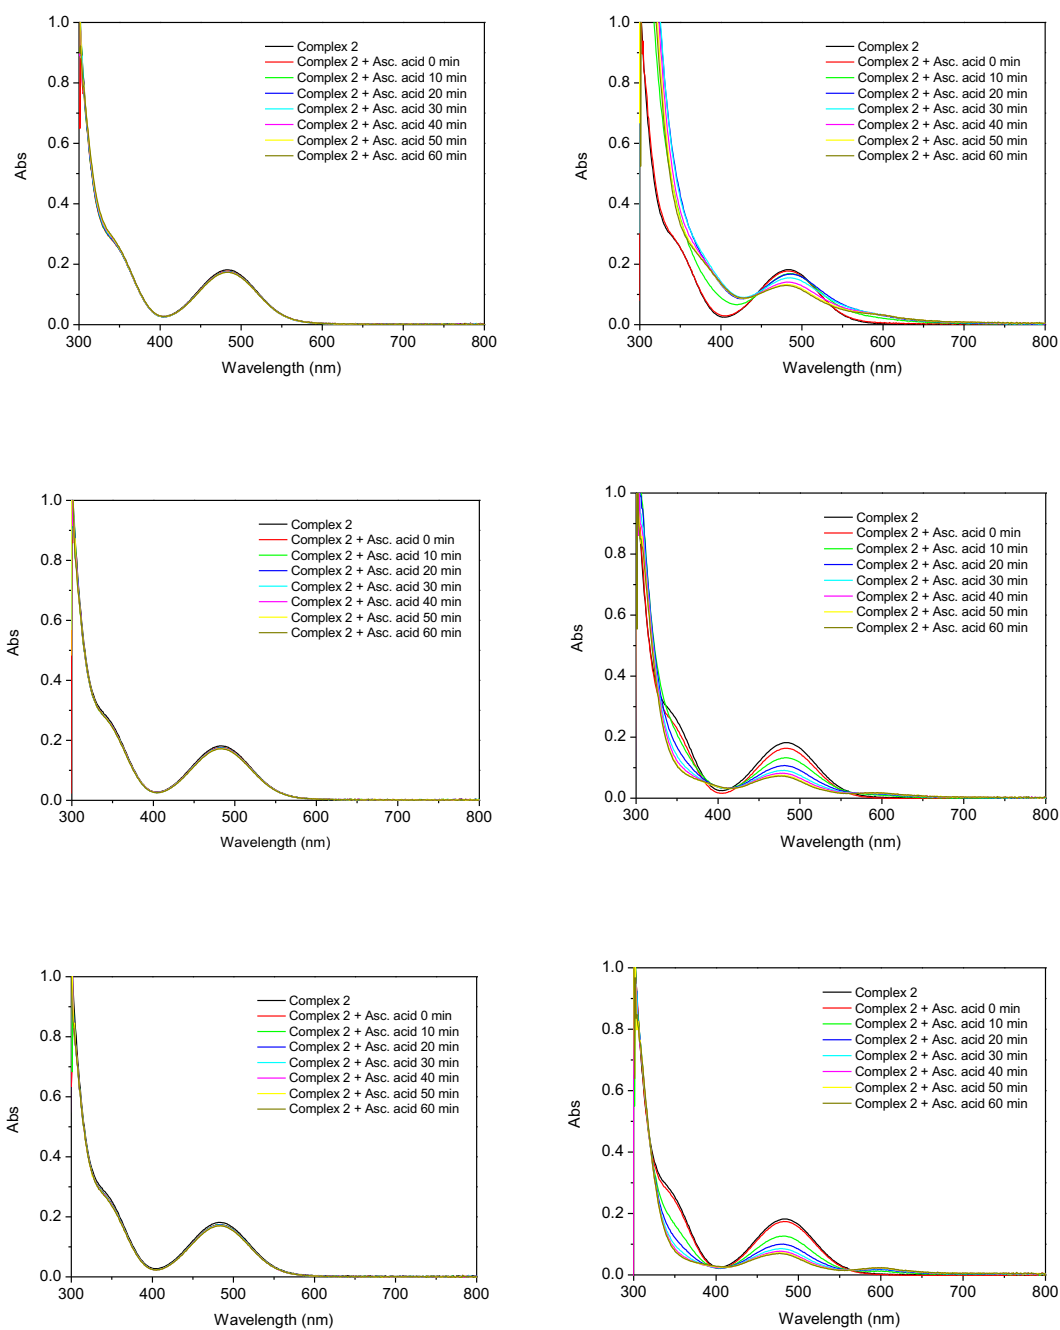

Fig. S44. UV-Visible spectra of complex **2** ( $1.0 \times 10^{-3}$  mol L<sup>-1</sup>) in pH 5.5 MES/DMSO (5%) (left) and pH 7.4 HEPES/DMSO (5%) (right), before and after reaction with ascorbic acid (5:1), saturated with O<sub>2</sub> (top), air (middle) and argon (bottom), at 25°C during 1 hour.

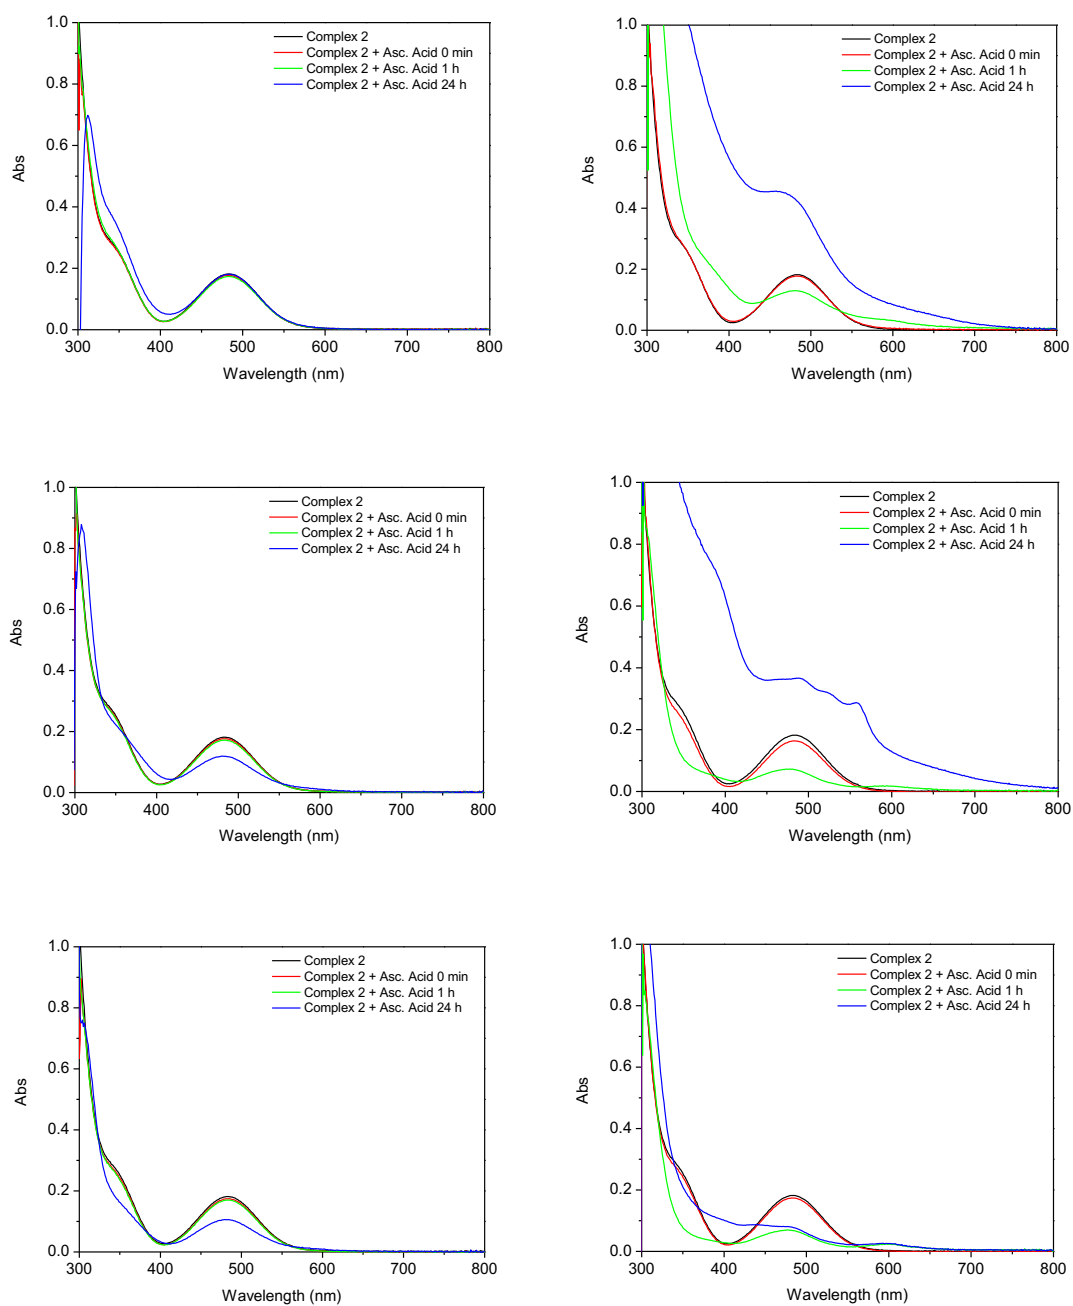

Fig. S45. UV-Visible spectra of complex **2** ( $1.0 \times 10^{-3}$  mol L<sup>-1</sup>) in pH 5.5 MES/DMSO (5%) (left) and pH 7.4 HEPES buffer/DMSO (5%) (right), before and after reaction with ascorbic acid (5:1), saturated with O<sub>2</sub> (top), air (middle) and argon (bottom), at 25°C during 24 hours.



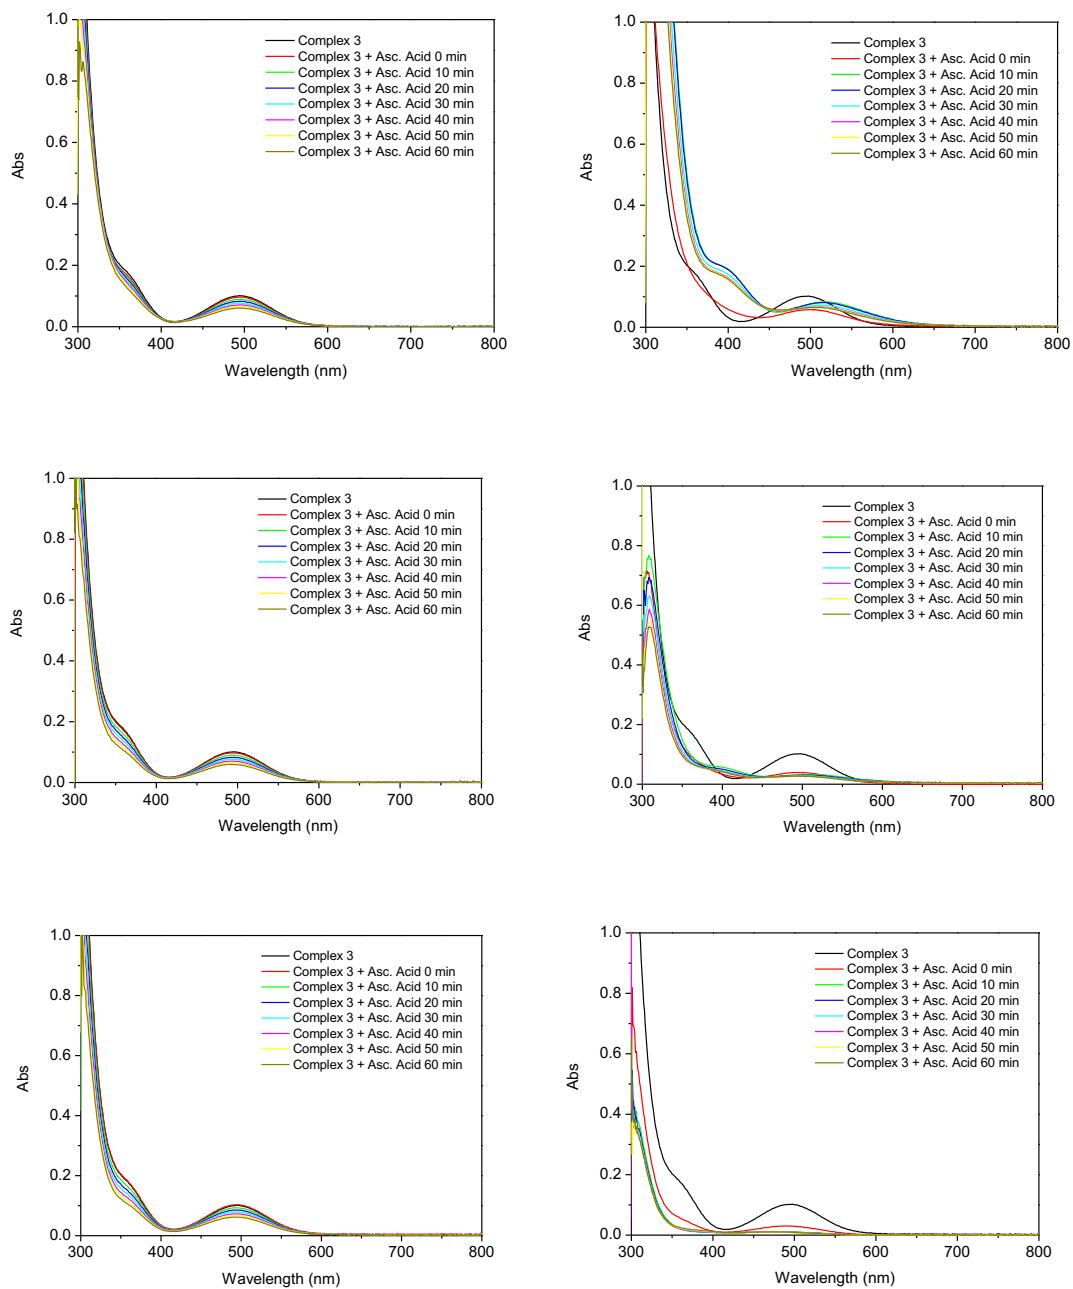

Fig. S46. UV-Visible spectra of complex **3** ( $1.0 \times 10^{-3}$  mol L<sup>-1</sup>) in pH 5.5 MES/DMSO (5%) (left) and pH 7.4 HEPES/DMSO (5%) (right), before and after reaction with ascorbic acid (5:1), saturated with O<sub>2</sub> (top), air (middle) and argon (bottom), at 25°C during 1 hour.

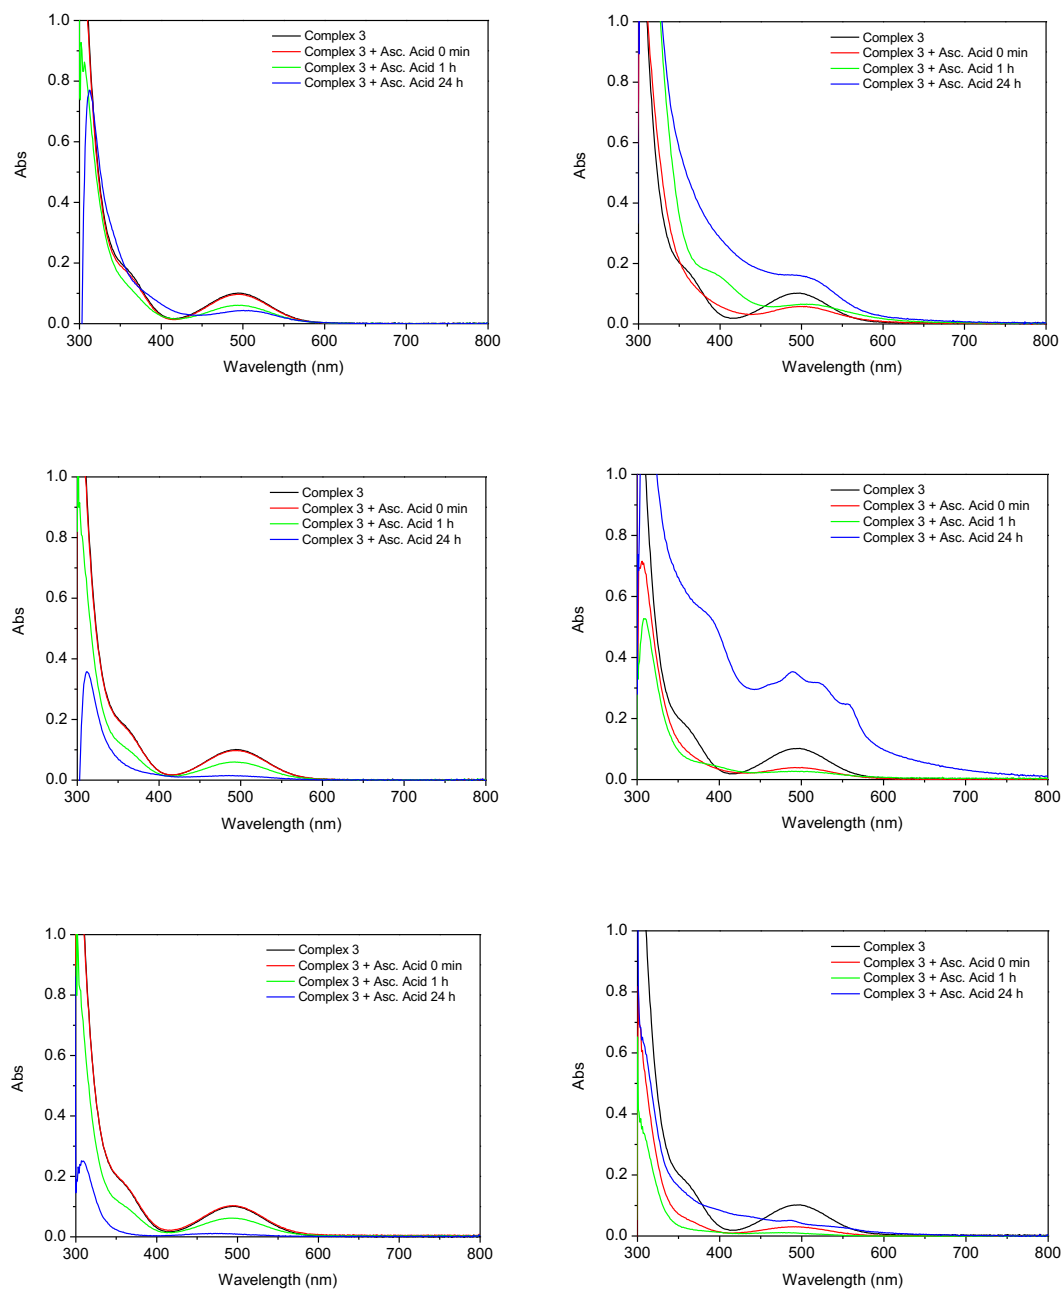

Fig. S47. UV-Visible spectra of complex **3** ( $1.0 \times 10^{-3} \text{ mol L}^{-1}$ ) in pH 5.5 MES/DMSO (5%) (left) and pH 7.4 HEPES/DMSO (5%) (right), before and after reaction with ascorbic acid (5:1), saturated with  $\text{O}_2$  (top), air (middle) and argon (bottom), at  $25^\circ\text{C}$  during 24 hours.

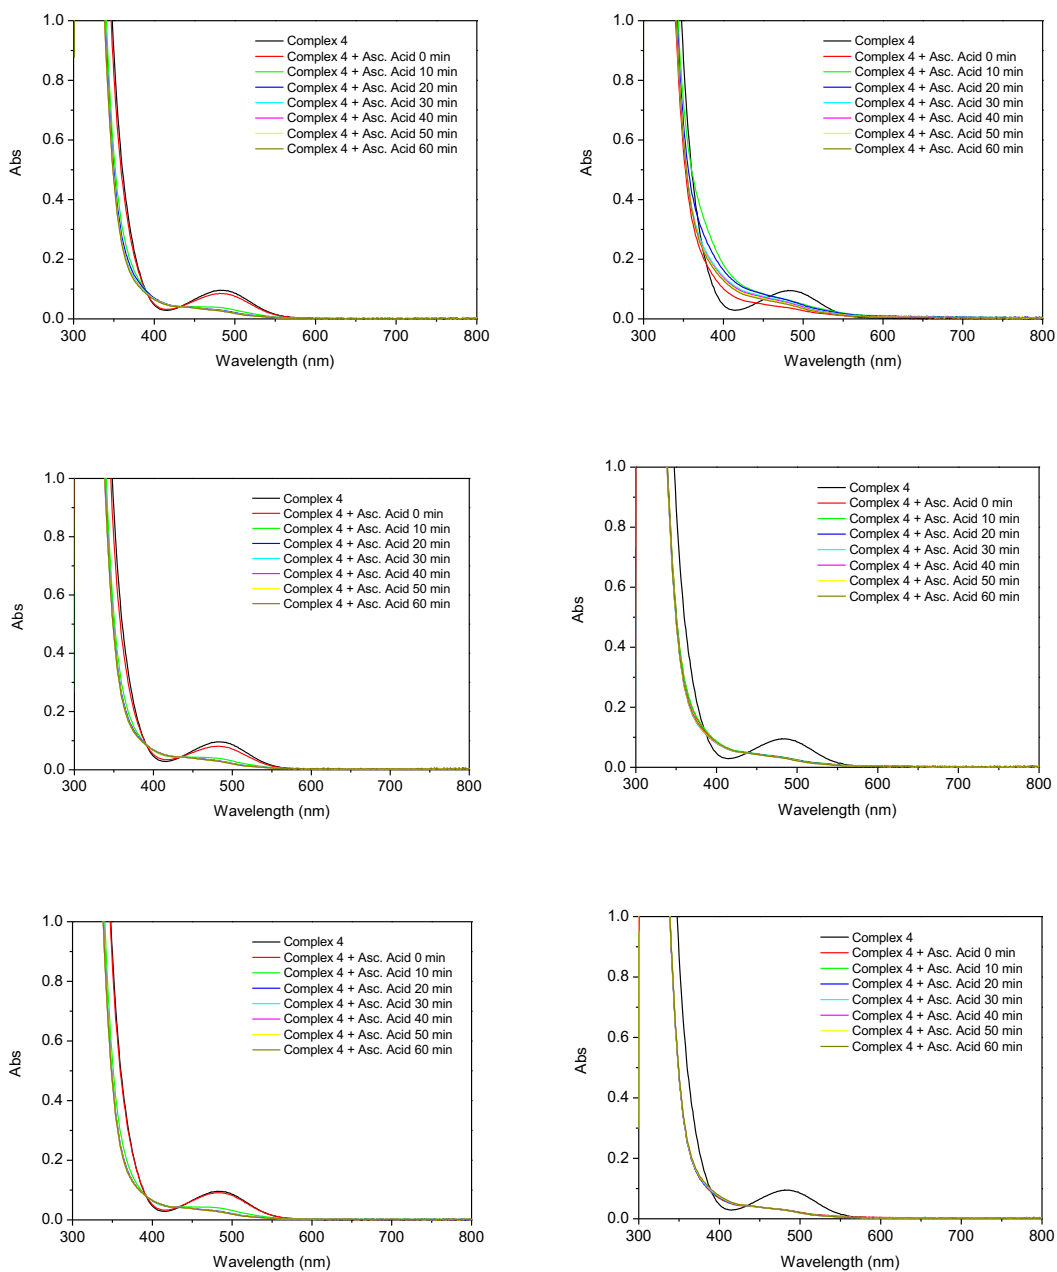

Fig. S48. UV-Visible spectra of complex **4** ( $1.0 \times 10^{-3} \text{ mol L}^{-1}$ ) in pH 5.5 MES/DMSO (5%) (left) and pH 7.4 HEPES/DMSO (5%) (right), before and after reaction with ascorbic acid (5:1), saturated with  $\text{O}_2$  (top), air (middle) and argon (bottom) at  $25^\circ\text{C}$  during 1 hour.

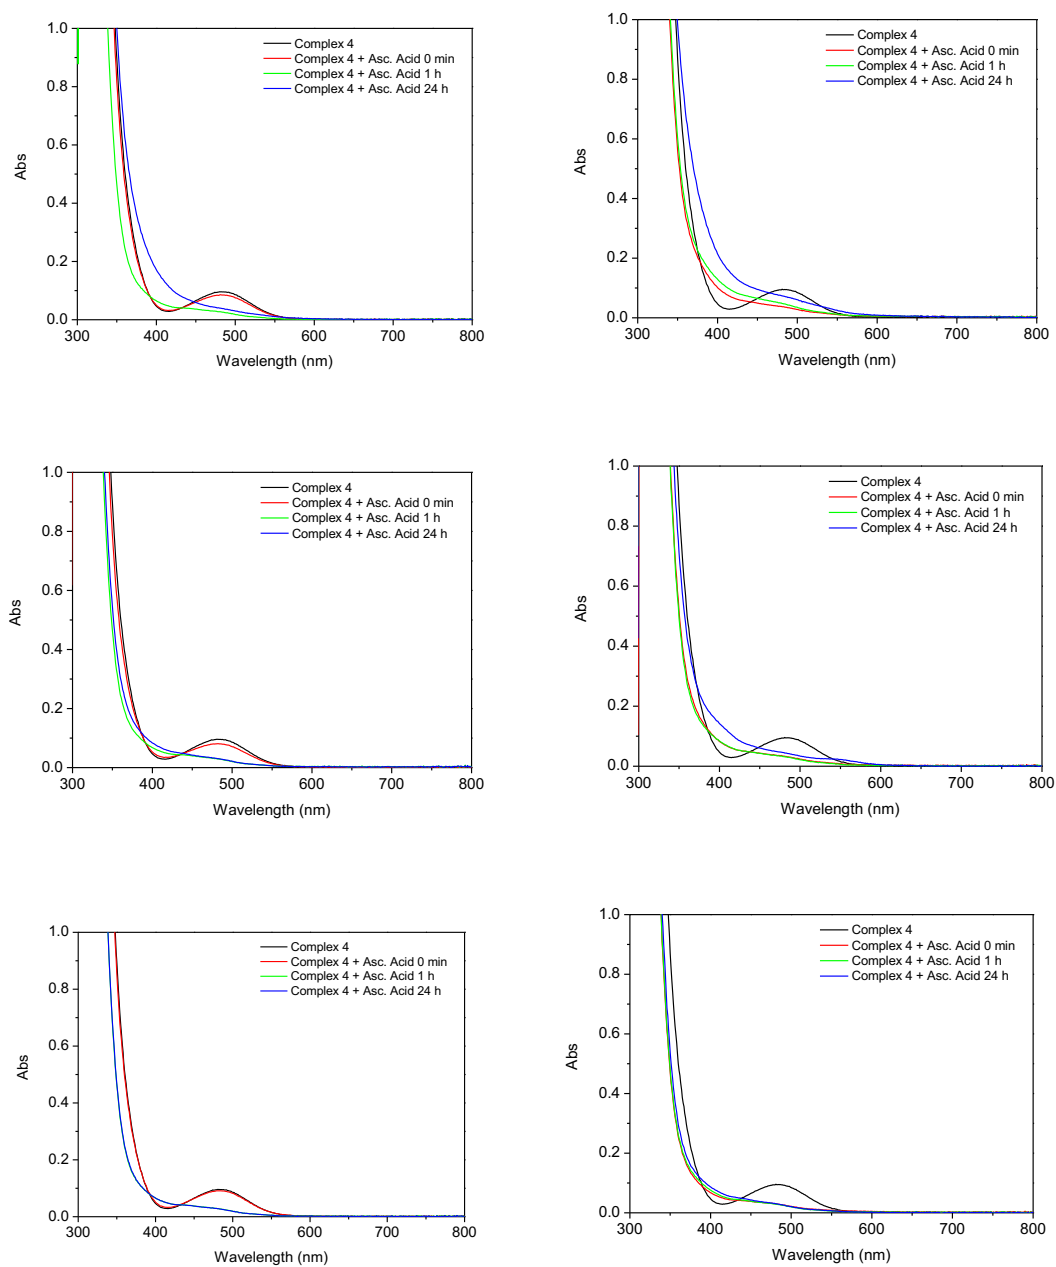

Fig. S49. UV-Visible spectra of complex **4** ( $1.0 \times 10^{-3}$  mol L<sup>-1</sup>) in pH 5.5 MES/DMSO (5%) (left) and pH 7.4 HEPES/DMSO (5%) (right), before and after reaction with ascorbic acid (5:1), saturated with O<sub>2</sub> (top), air (middle) and argon (bottom) at 25°C during 24 hours.

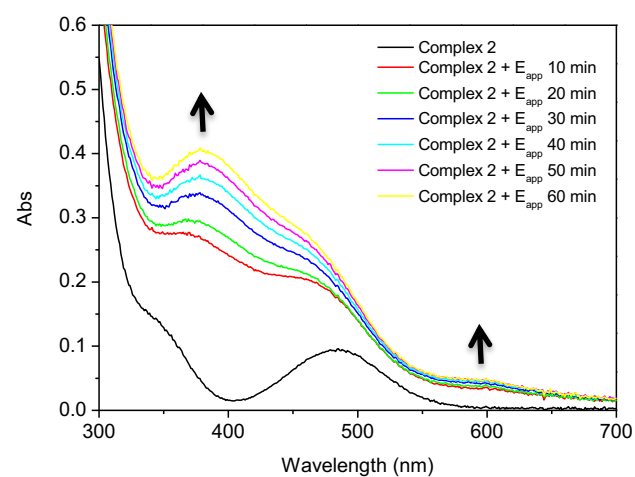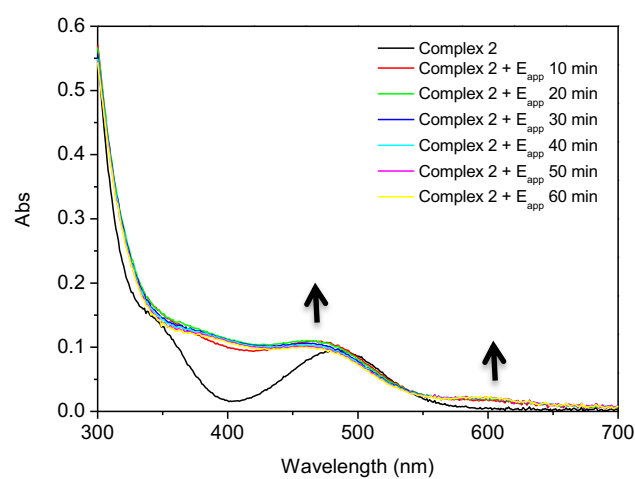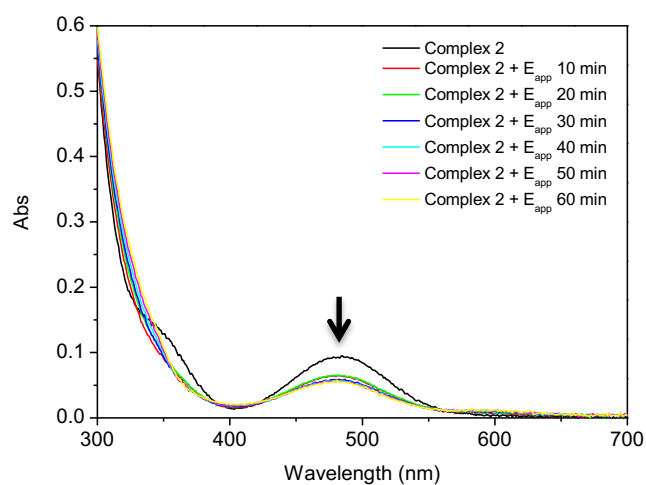

Fig. S50. Spectral changes for complex **2** ( $5.0 \times 10^{-3}$  mol L<sup>-1</sup>) during electrochemical reduction at E<sub>cpe</sub> = -325 mV vs Ag/AgCl in pH 7.4 HEPES/DMSO (10 %), saturated with O<sub>2</sub> (top), air (middle) and argon (bottom) at 25°C during 1 hour.

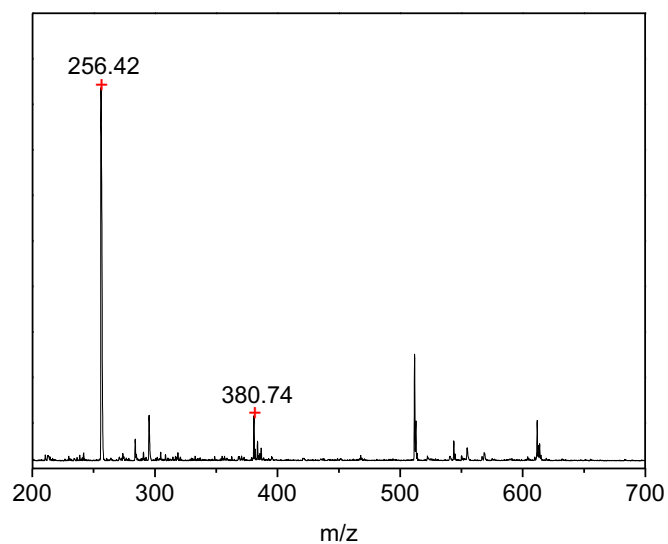

Fig. S51. ESI-MS ( $m/z^{2+}$ ) in water of complex **2**.

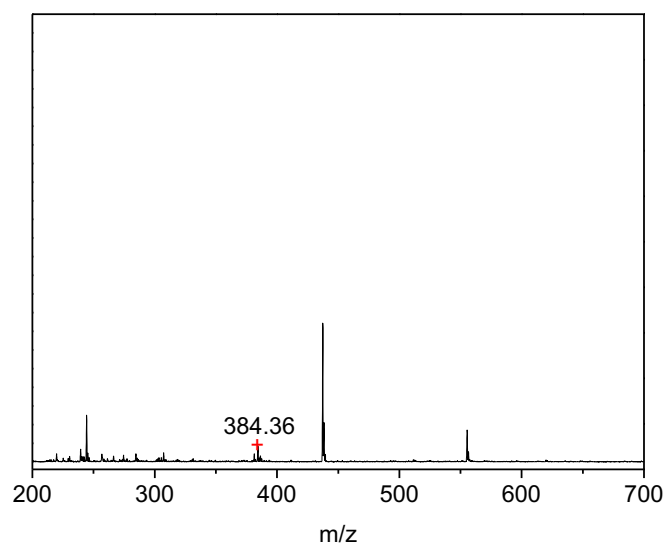

Fig. S52. ESI-MS ( $m/z^{2+}$ ) in water for reaction of complex **2** after with ascorbic acid (1:5), under air, after 24 h.
